# Supplementary material for: Genetic complexity in hypertrophic cardiomyopathy revealed by high-throughput sequencing
Source: PubMed Central journal article supplement — J Med Genet. 2013 Feb 8;50(4):228–39. doi: 10.1136/jmedgenet-2012-101270 (PMC3607113; doi:10.1136/jmedgenet-2012-101270), 2013-02-08
Supplement: jmedgenet-2012-101270-s2.pdf [file jmedgenet-2012-101270-s2.pdf]

**SUPPLEMENTAL MATERIAL – ADDITIONAL TABLES**

Table S1. List of distinct rare variants detected by high-throughput sequencing in our cohort. The number of patients with each variant and the reference for the published ones is provided.

| Gene         | Aminoacid change                      | Frequency | Publication                                                   |
|--------------|---------------------------------------|-----------|---------------------------------------------------------------|
| <i>ACTC1</i> | NM_005159:c.A361G;p.M121V             | 1         |                                                               |
| <i>ANK2</i>  | NM_001148:c.A4373G;p.E1458G           | 2         |                                                               |
| <i>ANK2</i>  | NM_001148:c.G7132A;p.E2378K           | 2         |                                                               |
| <i>ANK2</i>  | NM_001148:c.C9872G;p.P3291R           | 1         |                                                               |
| <i>ANK2</i>  | NM_001148:c.G5032A;p.E1678K           | 1         |                                                               |
| <i>ANK2</i>  | NM_020977:c.G5536A;p.E1846K           | 4         | Mohler PJ et al<br>Circulation 2007;115:432-41                |
| <i>ANK2</i>  | NM_001148:c.C8354T;p.S2785L           | 1         |                                                               |
| <i>ANK2</i>  | NM_001148:c.A7183C;p.T2395P           | 1         |                                                               |
| <i>ANK2</i>  | NM_001148:c.A7117G;p.T2373A           | 1         |                                                               |
| <i>ANK2</i>  | NM_020977:c.T4646A;p.V1549D           | 1         |                                                               |
| <i>ANK2</i>  | NM_001148:c.A6883G;p.T2295A           | 1         |                                                               |
| <i>ANK2</i>  | NM_001148:c.C2819G;p.A940G            | 1         |                                                               |
| <i>ANK2</i>  | NM_001148:c.G4745A;p.R1582Q           | 1         |                                                               |
| <i>ANK2</i>  | NM_001148:c.C5231T;p.A1744V           | 2         |                                                               |
| <i>ANK2</i>  | NM_001148:c.C5914A;p.Q1972K           | 1         |                                                               |
| <i>ANK2</i>  | NM_001148:c.C5231A;p.A1744D           | 1         |                                                               |
| <i>ANK2</i>  | NM_020977:c.C5461T;p.R1821W           | 1         | Mohler PJ et al<br>Proc Natl Acad Sci USA<br>2004;101:9137-42 |
| <i>ANK2</i>  | NM_001127493:exon28:c.2838-4G>A       | 1         |                                                               |
| <i>CASQ2</i> | NM_001232:c.1183_1185del;p.395_395del | 4         |                                                               |
| <i>CASQ2</i> | NM_001232:c.1132_1134del;p.378_378del | 1         |                                                               |
| <i>CAV3</i>  | NM_001234:c.C216G;p.C72W              | 2         | Cronk LB et al<br>Heart Rhythm 2007;4:161-6                   |
| <i>CSRP3</i> | NM_001127656:c.G449A;p.C150Y          | 2         |                                                               |
| <i>CSRP3</i> | NM_001127656:c.T10C;p.W4R             | 3         | Knöll R et al.<br>Cell 2002;111:943–55                        |
| <i>CSRP3</i> | NM_00112765:c.415-1G>T                | 1         |                                                               |
| <i>DES</i>   | NM_001927:c.G1286A;p.R429Q            | 1         |                                                               |
| <i>DES</i>   | NM_001927:c.A616G;p.N206D             | 1         |                                                               |
| <i>DES</i>   | NM_001927:exon3:c.640-4C>G            | 1         |                                                               |
| <i>DSC2</i>  | NM_004949:c.G857T;p.G299V             | 1         |                                                               |
| <i>DSC2</i>  | NM_004949:c.C266T;p.S89L              | 1         | Garcia-Pavia P et al<br>Heart 2011; 97(21):1744-52            |
| <i>DSC2</i>  | NM_004949:c.C1787T;p.A596V            | 1         | den Haan AD et al<br>Circ Cardiovasc Genet 2009;2(5):428-35   |
| <i>DSC2</i>  | NM_004949:c.T2194G;p.L732V            | 2         | Quarta et al.<br>Circulation 2011;123:2701-9.                 |
| <i>DSC2</i>  | NM_024422:c.2685_2686insAG;p.A895fs   | 5         | Quarta et al.<br>Circulation 2011;123:2701-9.                 |
| <i>DSC2</i>  | NM_004949:c.G2287A;p.A763T            | 1         |                                                               |
| <i>DSC2</i>  | NM_004949:c.G304A;p.E102K             | 2         | Quarta et al.<br>Circulation 2011;123:2701-9.                 |
| <i>DSC2</i>  | NM_024422:exon11:c.1264-5C>T          | 2         |                                                               |
| <i>DSG2</i>  | NM_001943:c.A2110G;p.I704V            | 1         |                                                               |

|               |                                         |    |                                                                |
|---------------|-----------------------------------------|----|----------------------------------------------------------------|
| <i>DSG2</i>   | NM_001943:c.G1174A:p.V392I              | 2  | Klauke et al.<br>Human Molecular Genetics<br>2010;19:4595-607. |
| <i>DSG2</i>   | NM_001943:c.C2750T:p.A917V              | 1  | Kapplinger JD et al<br>J Am Coll Cardiol 2011;57:2317-27       |
| <i>DSG2</i>   | NM_001943:c.A545G:p.N182S               | 1  |                                                                |
| <i>DSG2</i>   | NM_001943:c.T473G:p.V158G               | 1  | Syrris et al.<br>European Heart Journal 2007;28:581-8.         |
| <i>DSG2</i>   | NM_001943:c.G166A:p.V56M                | 3  | Syrris et al.<br>European Heart Journal 2007;28:581-8.         |
| <i>DSG2</i>   | NM_001943:c.A1376G:p.Y459C              | 1  |                                                                |
| <i>DSG2</i>   | NM_001943:c.C121A:p.H41N                | 1  |                                                                |
| <i>DSG2</i>   | NM_001943:c.A3109G:p.N1037D             | 1  |                                                                |
| <i>DSP</i>    | NM_004415:c.A5363G:p.Q1788R             | 1  |                                                                |
| <i>DSP</i>    | NM_004415:c.G1445A:p.C482Y              | 1  |                                                                |
| <i>DSP</i>    | NM_004415:c.G5881A:p.V1961I             | 1  |                                                                |
| <i>DSP</i>    | NM_004415:c.C2422T:p.R808C              | 1  |                                                                |
| <i>DSP</i>    | NM_004415:c.C5178A:p.N1726K             | 1  | Klauke et al.<br>Human Molecular Genetics<br>2010;19:4595-607. |
| <i>DSP</i>    | NM_004415:c.A3706G:p.R1236G             | 2  |                                                                |
| <i>DSP</i>    | NM_004415.2:c.C6482T:p.A2760V           | 1  |                                                                |
| <i>DSP</i>    | NM_004415.2:c.T5835G:p.F2544L           | 1  |                                                                |
| <i>DSP</i>    | NM_004415.2:c.G1696A:p.A566T            | 1  | Basso et al.<br>European Heart Journal 2006;27:1847-54.        |
| <i>DSP</i>    | NM_004415.2:c.G4411A:p.D2070N           | 4  |                                                                |
| <i>DSP</i>    | NM_004415.2:c.T8191C:p.Y2731H           | 1  |                                                                |
| <i>DSP</i>    | NM_004415:c.G4105A:p.E1369K             | 1  |                                                                |
| <i>DSP</i>    | NM_004415:c.A5120G:p.Q1707R             | 1  |                                                                |
| <i>DSP</i>    | NM_004415.2:p.K2450N                    | 1  |                                                                |
| <i>DSP</i>    | NM_001008844:c.1_2insA:p.M1fs           | 16 |                                                                |
| <i>DSP</i>    | NM_004415:c.G1483A:p.V495M              | 1  |                                                                |
| <i>JUP</i>    | NM_002230:c.A1324T:p.I442F              | 1  |                                                                |
| <i>JUP</i>    | NM_002230:c.A2069G:p.N690S              | 1  |                                                                |
| <i>JUP</i>    | NM_002230:c.C1096G:p.P366A              | 1  |                                                                |
| <i>KCNE1</i>  | NM_001127670:c.C106T:p.R36C             | 1  |                                                                |
| <i>KCNE1</i>  | NM_001127670:c.C314T:p.S105L            | 1  |                                                                |
| <i>KCNH2</i>  | NM_172057:c.G2144A:p.R715Q              | 1  |                                                                |
| <i>KCNH2</i>  | NM_001204798:c.G1490T:p.G497V           | 1  |                                                                |
| <i>KCNQ1</i>  | NM_000218:c.C458T:p.T153M               | 1  | Kapplinger JD<br>Heart Rhythm 2009 ;6(9):1297-303              |
| <i>KCNQ1</i>  | NM_000218:c.G1179T:p.K393N              | 1  |                                                                |
| <i>KCNQ1</i>  | NM_000218:c.G1520A:p.R507Q              | 1  |                                                                |
| <i>KCNQ1</i>  | NM_000218:c.C1201T:p.R401W              | 1  |                                                                |
| <i>LDB3</i>   | NM_001080115:c.G352A:p.V118M            | 3  |                                                                |
| <i>LDB3</i>   | NM_001080114:c.G1264C:p.A422P           | 1  |                                                                |
| <i>LDB3</i>   | NM_001080114:c.G459C:p.Q153H            | 1  |                                                                |
| <i>LMNA</i>   | NM_170708:c.C1840T:p.R614C              | 1  |                                                                |
| <i>MYBPC3</i> | NM_000256:c.C3811T:p.R1271X             | 1  |                                                                |
| <i>MYBPC3</i> | NM_000256:c.3580_3591del:p.1194_1197del | 1  |                                                                |
| <i>MYBPC3</i> | NM_000256:c.C3771A:p.N1257K             | 2  |                                                                |

|        |                                             |   |                                                             |
|--------|---------------------------------------------|---|-------------------------------------------------------------|
| MYBPC3 | NM_000256:c.3333_3334insGTG:p.E1111delinsEW | 1 |                                                             |
| MYBPC3 | NM_000256:c.G2497A:p.A833T                  | 1 | Morner S et al<br>J Mol Cell Cardiol 2003;35:841-9;         |
| MYBPC3 | NM_000256:c.G3763A:p.A1255T                 | 2 | Richard P et al<br>Circulation 2003;107:2227-32             |
| MYBPC3 | NM_000256:c.2512_2513insG:p.E838fs          | 1 |                                                             |
| MYBPC3 | NM_000256:c.C1504T:p.R502W                  | 3 | Richard P et al<br>Circulation 2003;107:2227-32             |
| MYBPC3 | NM_000256:c.2524_2525insT:p.Y842fs          | 1 |                                                             |
| MYBPC3 | NM_000256:c.C1303T:p.Q435X                  | 1 |                                                             |
| MYBPC3 | NM_000256:c.G3065C:p.R1022P                 | 1 | Brito D et al<br>Rev Port Cardiol 2005;24:1137-46           |
| MYBPC3 | NM_000256:c.G961A:p.V321M                   | 1 | Maron BJ et al<br>Heart Rhythm 2012;9(1):57-63              |
| MYBPC3 | NM_000256:c.G977A:p.R326Q                   | 2 | Niimura H et al<br>Circulation 2002;105:446-51              |
| MYBPC3 | NM_000256:c.G1484A:p.R495Q                  | 3 | Niimura H et al<br>N Engl J Med 1998;338:1248-57            |
| MYBPC3 | NM_000256:c.T1573C:p.Y525H                  | 1 |                                                             |
| MYBPC3 | NM_000256:c.3227_3228insT:p.D1076fs         | 1 | Zimmerman RS et al<br>Genet Med 2010;12:268-78              |
| MYBPC3 | NM_000256:c.3621delC:p.S1207fs              | 1 |                                                             |
| MYBPC3 | NM_000256:c.2373_2374insG:p.Q791fs          | 3 | Niimura H et al.<br>N Engl J Med 1998;338:1248-57           |
| MYBPC3 | NM_000256:c.G1471A:p.V491M                  | 1 | Millat G et al<br>Clin Chim Acta. 2010;411(23-24):1983-91   |
| MYBPC3 | NM_000256:c.G2429A:p.R810H                  | 1 | Nanni L et al<br>Bioch Biophys Res Commun<br>2003;309:391-8 |
| MYBPC3 | NM_000256:c.C2827T:p.R943X                  | 1 | Van Driest SL et al<br>J Am Coll Cardiol 2004;44:1903-10    |
| MYBPC3 | NM_000256:c.C1302A:p.Y434X                  | 1 |                                                             |
| MYBPC3 | NM_000256:c.2093delC:p.A698fs               | 1 |                                                             |
| MYBPC3 | NM_000256:c.C3572T:p.S1191L                 | 1 |                                                             |
| MYBPC3 | NM_000256:c.C1483G:p.R495G                  | 1 | Morita H et al<br>N Engl J Med 2008;358:1899-908.           |
| MYBPC3 | NM_000256:c.3402_3404del:p.1134_1135del     | 1 |                                                             |
| MYBPC3 | NM_000256:c.C859T:p.H287Y                   | 1 | Millat G et al<br>Eur J Med Genet. 2010;53(5):261-7         |
| MYBPC3 | NM_000256:c.G772A:p.E258K                   | 2 | Niimura H et al.<br>N Engl J Med 1998;338:1248-57           |
| MYBPC3 | NM_000256:c.G2459A:p.R820Q                  | 1 | Konno T et al<br>J Am Coll Cardiol 2003;41:781-6            |
| MYBPC3 | NM_000256:c.C484T:p.Q162X                   | 1 |                                                             |
| MYBPC3 | NM_000256:exon13:c.1090+1G>A                | 1 | Girolami F et al.<br>J Cardiovasc Med 2006;7:601-7          |
| MYBPC3 | NM_000256:c.3596_3605del:p.1199_1202del     | 1 |                                                             |
| MYBPC3 | NM_000256:c.2604delT:p.G868fs               | 1 |                                                             |
| MYBPC3 | NM_000256:c.G1624C:p.E542Q                  | 1 | Charron P et al<br>Circulation 1998 97(22):2230-6.          |
| MYBPC3 | NM_000256:c.1019_1026del:p.340_342del       | 1 |                                                             |
| MYBPC3 | NM_000256:c.174_184del:p.58_62del           | 3 | Lakdawala NK et al<br>Am J Cardiol 2011 Sep 21              |
| MYBPC3 | NM_000256:c.G655C:p.V219L                   | 1 | Van Driest SL et al<br>J Am Coll Cardiol 2004;44:1903-10    |
| MYBPC3 | NM_000256:c.2605_2606insC:p.P869fs          | 1 |                                                             |
| MYBPC3 | NM_000256:exon26:c.2603-2A>G                | 1 |                                                             |
| MYBPC3 | NM_000256:exon13:c.1090+1G>T                | 2 |                                                             |
| MYBPC3 | NM_000256:exon27:c.2905+1G>A                | 1 | Kimura A et al<br>Nat Genet 1997;16:379-82                  |

|        |                              |   |                                                                          |
|--------|------------------------------|---|--------------------------------------------------------------------------|
| MYBPC3 | NM_000256:exon17:c.1624+5G>T | 1 |                                                                          |
| MYBPC3 | NM_000256:exon30:c.3330+5G>C | 1 | Watkins H et al<br>Nat Genet 1995 ;11(4):434-7.                          |
| MYBPC3 | NM_000256:exon17:c.1624+4A>T | 1 | Ingles J et al<br>J Med Genet 2005;42 (10) :e59.                         |
| MYH6   | NM_002471:c.G622A:p.D208N    | 1 |                                                                          |
| MYH6   | NM_002471:c.C5410A:p.Q1804K  | 1 |                                                                          |
| MYH6   | NM_002471:c.C245T:p.P82L     | 1 |                                                                          |
| MYH6   | NM_002471:c.C70A:p.L24I      | 2 |                                                                          |
| MYH6   | NM_002471:c.G5477A:p.G1826D  | 1 |                                                                          |
| MYH6   | NM_002471:c.G5476A:p.G1826S  | 1 |                                                                          |
| MYH6   | NM_002471:c.C5644A:p.R1882S  | 1 |                                                                          |
| MYH6   | NM_002471:c.C3932T:p.T1311I  | 1 |                                                                          |
| MYH6   | NM_002471:c.C3427T:p.R1143W  | 1 |                                                                          |
| MYH6   | NM_002471:c.G3164A:p.R1055Q  | 1 |                                                                          |
| MYH6   | NM_002471:c.C4704A:p.N1568K  | 1 |                                                                          |
| MYH6   | NM_002471:c.G5594A:p.R1865Q  | 1 | Granados-Riveron JT et al<br>Hum Mol Genet 2010 Jul 23                   |
| MYH6   | NM_002471:c.A1763C:p.D588A   | 1 |                                                                          |
| MYH6   | NM_002471:c.C5140T:p.R1714W  | 1 |                                                                          |
| MYH6   | NM_002471:c.C2425T:p.R809C   | 1 |                                                                          |
| MYH6   | NM_002471:c.G2071A:p.V691I   | 1 |                                                                          |
| MYH6   | NM_002471:c.C1327T:p.R443C   | 1 |                                                                          |
| MYH6   | NM_002471:exon35:c.5163+1G>T | 1 |                                                                          |
| MYH6   | NM_002471:exon23:c.2928+5G>A | 3 |                                                                          |
| MYH7   | NM_000257:c.G767A:p.G256E    | 1 | Fananapazir L et al<br>Proc Natl Acad Sci U S A<br>1993;90:3993-7        |
| MYH7   | NM_000257:c.A2717G:p.D906G   | 2 | Alpert NR et al<br>Am J Physiol Heart Circ Physiol<br>2005;288:H1097-102 |
| MYH7   | NM_000257:c.C2167T:p.R723C   | 1 | Watkins H et al<br>N Engl J Med 1992;326:1108-14                         |
| MYH7   | NM_000257:c.G746A:p.R249Q    | 1 | Woo A et al<br>Heart 2003;89:1179-85                                     |
| MYH7   | NM_000257:c.G1063A:p.A355T   | 2 | Richard P et al<br>Circulation 2003;107:2227-32                          |
| MYH7   | NM_000257:c.G2389A:p.A797T   | 1 | Erdmann J et al<br>Clin Genet 2003;64:339-49                             |
| MYH7   | NM_000257:c.A2681G:p.E894G   | 1 | Van Driest SL et al<br>J Am Coll Cardiol 2004;44:602-10                  |
| MYH7   | NM_000257:c.G1988A:p.R663H   | 3 | Gruver EJ et al<br>Am J Cardiol 1999;83:13H-8H                           |
| MYH7   | NM_000257:c.T1433A:p.I478N   | 1 |                                                                          |
| MYH7   | NM_000257:c.G1144T:p.D382Y   | 1 | Kaski JP et al<br>Circ Cardiovasc Genet 2009;2:436-41                    |
| MYH7   | NM_000257:c.T2945C:p.M982T   | 1 | Morita H et al<br>Circulation 2006;113:2697-705                          |
| MYH7   | NM_000257:c.A1051G:p.K351E   | 1 | Mohiddin SA et al.<br>Genet Test 2003 ;7(1):21-7                         |
| MYH7   | NM_000257:c.A2669C:p.Q890P   | 1 |                                                                          |
| MYH7   | NM_000257:c.G2156A:p.R719Q   | 1 | Consevage MW et al<br>Hum Mol Genet 1994;3:1025-6                        |
| MYH7   | NM_000257:c.G5342A:p.R1781H  | 1 | Laredo R.<br>Rev Esp Cardiol 2006;59(10):1008-18                         |
| MYH7   | NM_000257:c.G50A:p.R17H      | 1 |                                                                          |
| MYH7   | NM_000257:c.C1279A:p.L427M   | 2 |                                                                          |
| MYH7   | NM_000257:c.G298A:p.A100T    | 1 |                                                                          |
| MYH7   | NM_000257:c.G3622A:p.D1208N  | 1 |                                                                          |
| MYH7   | NM_000257:c.A2464T:p.M822L   | 1 | Mohiddin SA et al<br>Genet Test 2003;7(1):21-7                           |
| MYH7   | NM_000257:c.A2783G:p.D928G   | 1 |                                                                          |

|        |                                       |   |                                                              |
|--------|---------------------------------------|---|--------------------------------------------------------------|
| MYH7   | NM_000257:c.C1207T;p.R403W            | 2 | Charron P et al<br>Eur Heart J 1998;19:139-145               |
| MYH7   | NM_000257:c.G2221C;p.G741R            | 1 | Van Driest SL et al<br>J Am Coll Cardiol 2004 ;44(3):602-10. |
| MYH7   | NM_000257:c.T1870A;p.Y624N            | 1 | Ohsuzu F et al<br>Int J Cardiol 1997;62:203-209              |
| MYH7   | NM_000257:c.G2609A;p.R870H            | 1 | Nishi H et al<br>Circulation 1993; 88(4):343                 |
| MYH7   | NM_000257:c.G1816A;p.V606M            | 1 | Olivotto I et al<br>Mayo Clin Proc 2008;83(6):630-8          |
| MYH7   | NM_000257:c.G2348A;p.R783H            | 1 | Waldmuller S et al<br>Clin Chem 2008;54(4):682-7.            |
| MYH7   | NM_000257:c.A2846T;p.E949V            | 1 |                                                              |
| MYH7   | NM_000257:c.2537_2539del;p.846_847del | 1 |                                                              |
| MYH7   | NM_000257:c.G4066A;p.E1356K           | 1 | Van Driest SL et al<br>J Am Coll Cardiol 2004 ;44(3):602-10. |
| MYH7   | NM_000257:c.A2792G;p.E931G            | 1 |                                                              |
| MYL2   | NM_000432:c.G64A;p.E22K               | 1 | Poetter K et al<br>Nat Genet 1996 ;13(1):63-9                |
| MYL2   | NM_000432:c.A401C;p.E134A             | 1 | Olivotto I et al.<br>Mayo Clin Proc 2008;83(6):630-8         |
| MYL2   | NM_000432:c.G37A;p.A13T               | 1 | Poetter K et al<br>Nat Genet 1996;13:63-9.                   |
| MYL3   | NM_000258:c.C476T;p.T159M             | 1 |                                                              |
| MYL3   | NM_000258:c.C460T;p.R154C             | 1 |                                                              |
| PDLIM3 | NM_001114107:c.A883G;p.T295A          | 1 |                                                              |
| PDLIM3 | NM_014476:c.G547T;p.V183L             | 1 |                                                              |
| PKP2   | NM_001005242:c.C485T;p.T162M          | 1 |                                                              |
| PKP2   | NM_001005242:c.T1809G;p.C603W         | 2 |                                                              |
| PKP2   | NM_001005242:c.A1372G;p.I458V         | 2 |                                                              |
| PKP2   | NM_001005242:c.G302A;p.R101H          | 1 | Fressart et al<br>Europace 2010;12:861-8.                    |
| PKP2   | NM_001005242:c.G174T;p.E58D           | 1 | Fressart et al<br>Europace 2010;12:861-8.                    |
| PKP2   | NM_001005242:c.G775T;p.E259X          | 1 | Quarta G et al<br>Circulation 2011 Jun 14;123(23):2701-9.    |
| PKP4   | NM_001005476:c.C2120T;p.A707V         | 1 |                                                              |
| PKP4   | NM_001005476:c.A1879G;p.I627V         | 1 |                                                              |
| PKP4   | NM_001005476:c.C3233G;p.S1078C        | 2 |                                                              |
| PKP4   | NM_001005476:c.C956T;p.T319M          | 1 |                                                              |
| PKP4   | NM_001005476:c.A329G;p.Q110R          | 1 |                                                              |
| PKP4   | NM_001005476:c.A2168G;p.Y723C         | 1 |                                                              |
| PKP4   | NM_001005476:c.C2969T;p.T990I         | 1 |                                                              |
| PKP4   | NM_001005476:c.G3311A;p.R1104Q        | 1 |                                                              |
| PLN    | NM_002667:c.G26A;p.R9H                | 1 |                                                              |
| PLN    | NM_002667:c.T152C;p.L51P              | 1 |                                                              |
| PLN    | NM_002667:c.T53C;p.I18T               | 1 |                                                              |
| PLN    | NM_002667:c.C73T;p.R25C               | 1 |                                                              |
| PNN    | NM_002687:c.C914T;p.A305V             | 1 |                                                              |
| PNN    | NM_002687:c.A1646C;p.H549P            | 1 |                                                              |
| RBM20  | NM_001134363:c.G850A;p.G284R          | 3 |                                                              |
| RBM20  | NM_001134363:c.C3266G;p.P1089R        | 1 |                                                              |
| RBM20  | NM_001134363:c.G3373A;p.E1125K        | 5 |                                                              |
| RBM20  | NM_001134363:c.C2213T;p.P738L         | 1 |                                                              |
| RBM20  | NM_001134363:c.C2239T;p.H747Y         | 1 |                                                              |
| RBM20  | NM_001134363:c.C1364T;p.S455L         | 4 | Refaat MM et al<br>Heart Rhythm.2012 Mar;9(3):390-6.         |
| RBM20  | NM_001134363:c.G1633A;p.V545I         | 1 |                                                              |

|               |                                     |   |                                                               |
|---------------|-------------------------------------|---|---------------------------------------------------------------|
| <i>RBM20</i>  | NM_001134363:c.G3023A:p.R1008Q      | 1 |                                                               |
| <i>RBM20</i>  | NM_001134363:c.G1766A:p.R589Q       | 1 |                                                               |
| <i>RYR2</i>   | NM_001035:c.G8274T:p.K2758N         | 1 |                                                               |
| <i>RYR2</i>   | NM_001035:c.G3038A:p.R1013Q         | 1 | Medeiros-Domingo A et al<br>J Am Coll Cardiol 2009;54:2065-74 |
| <i>RYR2</i>   | NM_001035:c.G5102C:p.G1701A         | 1 |                                                               |
| <i>RYR2</i>   | NM_001035:c.G9455T:p.R3152L         | 1 |                                                               |
| <i>RYR2</i>   | NM_001035:c.C2080T:p.R694X          | 1 |                                                               |
| <i>RYR2</i>   | NM_001035:exon39:c.5917-1G>C        | 1 |                                                               |
| <i>RYR2</i>   | NM_001035:c.C10681G:p.L3561V        | 1 |                                                               |
| <i>RYR2</i>   | NM_001035:c.C3037T:p.R1013W         | 1 |                                                               |
| <i>RYR2</i>   | NM_001035:c.C3151T:p.R1051C         | 1 |                                                               |
| <i>RYR2</i>   | NM_001035:c.G6450A:p.M2150I         | 1 |                                                               |
| <i>RYR2</i>   | NM_001035:exon20:c.2203+5G>A        | 1 |                                                               |
| <i>RYR2</i>   | NM_001035:exon72:c.10324-4A>G       | 2 |                                                               |
| <i>SCN5A</i>  | NM_198056.2:c.C3749T:p.T1304M       | 2 | Wattanasirichaigoon D et al<br>Am J Med Genet 1999;86:470-6   |
| <i>SCN5A</i>  | NM_000335:c.G496A:p.A166T           | 1 |                                                               |
| <i>SCN5A</i>  | NM_000335:c.A619G:p.T207A           | 1 |                                                               |
| <i>SCN5A</i>  | NM_001099405:c.G5306A:p.S1769N      | 1 |                                                               |
| <i>SCN5A</i>  | NM_000335:c.G1982A:p.R661Q          | 1 |                                                               |
| <i>SCN5A</i>  | NM_001099405:c.G5401A:p.D1819N      | 1 | Millat G et al<br>Clin Genet 2006;70(3):214-27                |
| <i>SCN5A</i>  | NM_000335:c.G1655C:p.G552A          | 1 |                                                               |
| <i>SCN5A</i>  | NM_001099405:c.T5956C:p.F2004L      | 1 |                                                               |
| <i>SCN5A</i>  | NM_001160161:exon25:c.4275+4C>T     | 1 |                                                               |
| <i>TCAP</i>   | NM_003673:c.G4A:p.A2T               | 1 |                                                               |
| <i>TCAP</i>   | NM_003673:c.37_39del:p.13_13del     | 1 | Bos J et al<br>Mol Genet Metab 2006;88:78-85                  |
| <i>TMEM43</i> | NM_024334:c.G91A:p.E31K             | 1 |                                                               |
| <i>TMEM43</i> | NM_024334:exon3:c.163-3C>-          | 1 |                                                               |
| <i>TNNI3</i>  | NM_000363:c.G526A:p.V176M           | 2 |                                                               |
| <i>TNNI3</i>  | NM_000363:c.G485A:p.R162Q           | 1 | Bos JM et al<br>Mol Genet Metab. 2006; 88(1):78-85            |
| <i>TNNI3</i>  | NM_000363:c.G586A:p.D196N           | 1 | Richard P et al<br>Circulation 2003;107:2227-32               |
| <i>TNNI3</i>  | NM_000363:c.C592G:p.L198V           | 1 | Maron BJ et al<br>Heart Rhythm 2012;9(1):57-6                 |
| <i>TNNI3</i>  | NM_000363:c.G511A:p.A171T           | 1 | Mogensen J et al<br>J Clin Invest, 2003;111:209-216           |
| <i>TNNT2</i>  | NM_001001430:c.G842A:p.W287X        | 1 | Richard P et al<br>Circulation 2003;107:2227-32               |
| <i>TNNT2</i>  | NM_001001430:c.C814T:p.R278C        | 2 | Watkins H et al<br>N Engl J Med 1995;332:1058-64              |
| <i>TNNT2</i>  | NM_001001430:c.C296T:p.A104V        | 3 | Yamauchi-Tahikara K et al<br>Heart 1996;76:63-5               |
| <i>TNNT2</i>  | NM_001001430:c.A562G:p.T194A        | 1 |                                                               |
| <i>TNNT2</i>  | NM_001001430:c.G266A:p.R94H         | 1 | Millat G et al<br>Clin Chem Acta 2010;411:1983-91             |
| <i>TNNT2</i>  | NM_001001430:c.C259T:p.R92W         | 2 | Moolman JC et al<br>J Am Coll Cardiol 1997;29:549-55          |
| <i>TNNT2</i>  | NM_001001430:c.463_465del:p.E160del | 1 | Watkins H et al<br>N Engl J Med 1995;332:1058-64              |
| <i>TNNT2</i>  | NM_001001430:c.T221A:p.I79N         | 1 | Watkins H et al<br>N Engl J Med 1995;332:1058-64              |
| <i>TNNT2</i>  | NM_001001432:c.A794T:p.N271I        | 1 | Gimeno JR et al<br>Rev Esp Cardiol. 2009;62(12):1473-7.       |
| <i>TNNT2</i>  | NM_001001432:exon15:c.804-3C>A      | 1 |                                                               |
| <i>TPM1</i>   | NM_001018005:c.G466A:p.E192K        | 1 | Lakdawala NK et al<br>Am J Cardiol 2011 Sep 21                |

|      |                                                        |   |                                                     |
|------|--------------------------------------------------------|---|-----------------------------------------------------|
| TPM1 | NM_001018005:c.A653G;p.D254G                           | 1 |                                                     |
| TPM1 | NM_001018005:c.T638G;p.L249W                           | 1 |                                                     |
| TPM1 | NM_001018020:exon4:c.375-3C>T                          | 1 |                                                     |
| TPM1 | NM_001018020:exon4:c.375-5T>C                          | 1 | Zimmerman RS et al<br>Genet Med. 2010 ;12(5):268-78 |
| TTN  | NM_003319:c.G4394A;p.G1465D                            | 1 |                                                     |
| TTN  | NM_003319:c.G65810T;p.S21937I                          | 1 |                                                     |
| TTN  | NM_003319:c.A13778G;p.K4593R                           | 1 |                                                     |
| TTN  | NM_133378:c.29780_29781insAAT:p.E9927delinsEX          | 1 |                                                     |
| TTN  | NM_003319:c.C2080A;p.R694S                             | 1 |                                                     |
| TTN  | NM_003319:c.T62794A;p.L20932M                          | 1 |                                                     |
| TTN  | NM_133378:c.T20343G;p.I6781M                           | 1 |                                                     |
| TTN  | NM_133379:c.A13936G;p.K4646E                           | 7 |                                                     |
| TTN  | NM_003319:c.C35416G;p.L11806V                          | 2 |                                                     |
| TTN  | NM_003319:c.A19733G;p.H6578R                           | 1 |                                                     |
| TTN  | NM_003319:c.C49544A;p.T16515K                          | 2 |                                                     |
| TTN  | NM_003319:c.C57676T;p.R19226C                          | 1 |                                                     |
| TTN  | NM_003319:c.T3467C;p.V1156A                            | 2 |                                                     |
| TTN  | NM_003319:c.A45629T;p.K15210I                          | 2 |                                                     |
| TTN  | NM_003319:c.G34874A;p.R11625Q                          | 4 |                                                     |
| TTN  | NM_003319:c.A44954G;p.E14985G                          | 1 |                                                     |
| TTN  | NM_133378:c.G30865C;p.E10289Q                          | 1 |                                                     |
| TTN  | NM_003319:c.T50873C;p.I16958T                          | 1 |                                                     |
| TTN  | NM_003319:c.C21100T;p.R7034W                           | 1 |                                                     |
| TTN  | NM_003319:c.C45796T;p.R15266C                          | 1 |                                                     |
| TTN  | NM_003319:c.A12880C;p.N4294H                           | 1 |                                                     |
| TTN  | NM_003319:c.C33626T;p.P11209L                          | 2 |                                                     |
| TTN  | NM_133378:c.C19500G;p.N6500K                           | 2 |                                                     |
| TTN  | NM_003319:c.A78896G;p.E26299G                          | 1 |                                                     |
| TTN  | NM_003319:c.A25349G;p.H8450R                           | 1 |                                                     |
| TTN  | NM_003319:c.G36598A;p.D12200N                          | 1 |                                                     |
| TTN  | NM_003319:c.G72706A;p.E24236K                          | 1 |                                                     |
| TTN  | NM_003319:c.T76493C;p.V25498A                          | 1 |                                                     |
| TTN  | NM_133378:c.C13492T;p.L4498F                           | 1 |                                                     |
| TTN  | NM_003319:c.74120_74121insAGCCTTCAG:p.K24707delinsKPSE | 1 |                                                     |
| TTN  | NM_003319:c.74131_74132insCCTTCAGAT:p.P24711delinsPSDP | 1 |                                                     |
| TTN  | NM_003319:c.C26953T;p.R8985C                           | 1 |                                                     |
| TTN  | NM_003319:c.C2829A;p.F943L                             | 1 |                                                     |
| TTN  | NM_003319:c.C38486G;p.T12829R                          | 1 |                                                     |
| TTN  | NM_003319:c.G43636A;p.A14546T                          | 1 |                                                     |
| TTN  | NM_003319:c.C76441T;p.R25481C                          | 1 |                                                     |
| TTN  | NM_003319:c.G20053A;p.V6685I                           | 1 |                                                     |
| TTN  | NM_003319:c.G62231A;p.R20744Q                          | 1 |                                                     |
| TTN  | NM_133378:c.A24205G;p.T8069A                           | 1 |                                                     |
| TTN  | NM_003319:c.G23419C;p.A7807P                           | 1 |                                                     |
| TTN  | NM_133378:c.A13316G;p.Y4439C                           | 1 |                                                     |
| TTN  | NM_133379:c.C13586G;p.A4529G                           | 1 |                                                     |
| TTN  | NM_003319:c.A77579C;p.E25860A                          | 1 |                                                     |
| TTN  | NM_133378:c.C25001T;p.T8334M                           | 1 |                                                     |
| TTN  | NM_003319:c.G31202C;p.G10401A                          | 1 |                                                     |
| TTN  | NM_003319:c.A47900G;p.Y15967C                          | 1 |                                                     |
| TTN  | NM_003319:c.A12505G;p.T4169A                           | 1 |                                                     |
| TTN  | NM_003319:c.G24587A;p.R8196Q                           | 1 |                                                     |

|     |                                               |   |  |
|-----|-----------------------------------------------|---|--|
| TTN | NM_003319:c.C46139T;p.T15380I                 | 1 |  |
| TTN | NM_003319:c.C41222T;p.T13741I                 | 1 |  |
| TTN | NM_133378:c.C18047A;p.S6016Y                  | 1 |  |
| TTN | NM_133379:c.C16001T;p.P5334L                  | 1 |  |
| TTN | NM_133378:c.C28892T;p.P9631L                  | 1 |  |
| TTN | NM_003319:c.A16081G;p.K5361E                  | 1 |  |
| TTN | NM_003319:c.G23222A;p.G7741E                  | 1 |  |
| TTN | NM_133378:c.G31999A;p.E10667K                 | 1 |  |
| TTN | NM_003319:c.A6307G;p.I2103V                   | 1 |  |
| TTN | NM_003319:c.G65611A;p.V21871I                 | 1 |  |
| TTN | NM_003319:c.T62789C;p.I20930T                 | 1 |  |
| TTN | NM_133378:c.29784_29785insAGG;p.E9928delinsEG | 1 |  |
| TTN | NM_003319:c.G20120A;p.R6707Q                  | 1 |  |
| TTN | NM_133378:c.C15044G;p.T5015S                  | 1 |  |
| TTN | NM_133378:exon120:c.28031-1G>A                | 1 |  |
| TTN | NM_003319:c.C61509A;p.H20503Q                 | 1 |  |
| TTN | NM_003319:c.C59039T;p.A19680V                 | 1 |  |
| TTN | NM_003319:c.C53597T;p.T17866I                 | 1 |  |
| TTN | NM_133378:c.C32387T;p.A10796V                 | 1 |  |
| TTN | NM_003319:c.A32810G;p.D10937G                 | 1 |  |
| TTN | NM_133378:c.G18902A;p.R6301Q                  | 3 |  |
| TTN | NM_003319:c.C60217A;p.P20073T                 | 2 |  |
| TTN | NM_133378:c.G17911A;p.A5971T                  | 1 |  |
| TTN | NM_003319:c.T20954G;p.V6985G                  | 1 |  |
| TTN | NM_133378:c.29769_29770insAGA;p.V9923delinsVE | 9 |  |
| TTN | NM_133378:c.A21241G;p.K7081E                  | 4 |  |
| TTN | NM_133378:c.A11831C;p.Q3944P                  | 4 |  |
| TTN | NM_003319:c.C76097T;p.T25366M                 | 1 |  |
| TTN | NM_133378:c.G17632A;p.A5878T                  | 1 |  |
| TTN | NM_003319:c.G57068A;p.S19023N                 | 1 |  |
| TTN | NM_133378:c.G17066C;p.G5689A                  | 1 |  |
| TTN | NM_003319:c.A5126G;p.N1709S                   | 1 |  |
| TTN | NM_003319:c.47401_47403del;p.15801_15801del   | 2 |  |
| TTN | NM_003319:c.T67358C;p.V22453A                 | 1 |  |
| TTN | NM_003319:c.A3557T;p.D1186V                   | 1 |  |
| TTN | NM_003319:c.G55868A;p.R18623H                 | 2 |  |
| TTN | NM_003319:c.T68075C;p.I22692T                 | 2 |  |
| TTN | NM_003319:c.G62191A;p.V20731M                 | 3 |  |
| TTN | NM_003319:c.A42481G;p.S14161G                 | 9 |  |
| TTN | NM_003319:c.G20528A;p.R6843H                  | 8 |  |
| TTN | NM_133379:c.A13936G;p.K4646E                  | 7 |  |
| TTN | NM_003319:c.A755G;p.K252R                     | 1 |  |
| TTN | NM_133378:c.C15418A;p.P5140T                  | 1 |  |
| TTN | NM_003319:c.A30247G;p.M10083V                 | 2 |  |
| TTN | NM_003319:c.C78211T;p.R26071W                 | 1 |  |
| TTN | NM_003319:c.T69794C;p.I23265T                 | 1 |  |
| TTN | NM_003319:c.C19652T;p.T6551M                  | 1 |  |
| TTN | NM_133378:c.A31491T;p.E10497D                 | 1 |  |
| TTN | NM_003319:c.G18213T;p.K6071N                  | 3 |  |
| TTN | NM_003319:c.C41935T;p.P13979S                 | 3 |  |
| TTN | NM_003319:c.G22882A;p.V7628I                  | 1 |  |
| TTN | NM_003319:c.G26749A;p.E8917K                  | 2 |  |

|     |                                               |   |  |
|-----|-----------------------------------------------|---|--|
| TTN | NM_133378:c.C29126T;p.A9709V                  | 2 |  |
| TTN | NM_003319:c.G38395C;p.D12799H                 | 2 |  |
| TTN | NM_003319:c.G20803C;p.D6935H                  | 2 |  |
| TTN | NM_003319:c.G66851A;p.R22284H                 | 2 |  |
| TTN | NM_003319:c.C65429G;p.A21810G                 | 1 |  |
| TTN | NM_003319:c.T64415A;p.I21472N                 | 1 |  |
| TTN | NM_003319:c.C71099G;p.A23700G                 | 3 |  |
| TTN | NM_003319:c.G34727A;p.R11576Q                 | 3 |  |
| TTN | NM_003319:c.A30554C;p.Q10185P                 | 1 |  |
| TTN | NM_133379:c.G16160A;p.C5387Y                  | 3 |  |
| TTN | NM_133378:c.C11138T;p.T3713I                  | 1 |  |
| TTN | NM_133378:c.29783_29784insAAT;p.E9928delinsEX | 1 |  |
| TTN | NM_003319:c.A7620G;p.I2540M                   | 1 |  |
| TTN | NM_003319:c.A4221T;p.R1407S                   | 1 |  |
| TTN | NM_003319:c.C4151A;p.A1384E                   | 1 |  |
| TTN | NM_003319:c.A64406T;p.D21469V                 | 1 |  |
| TTN | NM_133378:c.C15300G;p.D5100E                  | 1 |  |
| TTN | NM_003319:c.G2962A;p.V988M                    | 1 |  |
| TTN | NM_133378:c.A22762G;p.I7588V                  | 1 |  |
| TTN | NM_133378:c.G16609A;p.E5537K                  | 1 |  |
| TTN | NM_003319:c.C44513G;p.A14838G                 | 1 |  |
| TTN | NM_003319:c.G42626A;p.G14209D                 | 1 |  |
| TTN | NM_003319:c.G38281A;p.E12761K                 | 1 |  |
| TTN | NM_133379:c.T16469C;p.L5490S                  | 1 |  |
| TTN | NM_003319:c.G41263C;p.A13755P                 | 1 |  |
| TTN | NM_133378:c.G21088A;p.E7030K                  | 2 |  |
| TTN | NM_003319:c.C19698G;p.D6566E                  | 1 |  |
| TTN | NM_133378:c.G19937T;p.R6646I                  | 1 |  |
| TTN | NM_003319:c.T44951C;p.L14984P                 | 1 |  |
| TTN | NM_003319:c.G49167A;p.M16389I                 | 1 |  |
| TTN | NM_003319:c.C77066T;p.A25689V                 | 1 |  |
| TTN | NM_003319:c.G60895A;p.G20299S                 | 1 |  |
| TTN | NM_003319:c.C3910T;p.R1304C                   | 1 |  |
| TTN | NM_003319:c.G3250C;p.V1084L                   | 1 |  |
| TTN | NM_003319:c.G77051A;p.R25684Q                 | 1 |  |
| TTN | NM_003319:c.A13241C;p.E4414A                  | 1 |  |
| TTN | NM_003319:c.A75400G;p.I25134V                 | 1 |  |
| TTN | NM_003319:c.G74696A;p.R24899H                 | 1 |  |
| TTN | NM_003319:c.C68102T;p.S22701F                 | 1 |  |
| TTN | NM_003319:c.G64570A;p.A21524T                 | 1 |  |
| TTN | NM_003319:c.T63631G;p.C21211G                 | 1 |  |
| TTN | NM_003319:c.G63341A;p.R21114H                 | 1 |  |
| TTN | NM_003319:c.C55365A;p.N18455K                 | 1 |  |
| TTN | NM_003319:c.G37594A;p.V12532M                 | 1 |  |
| TTN | NM_003319:c.G22724C;p.S7575T                  | 1 |  |
| TTN | NM_003319:c.C20350A;p.P6784T                  | 1 |  |
| TTN | NM_133378:c.A30663C;p.E10221D                 | 1 |  |
| TTN | NM_133378:c.G21758A;p.R7253H                  | 1 |  |
| TTN | NM_133378:c.C19806G;p.F6602L                  | 1 |  |
| TTN | NM_133378:c.A16443G;p.I5481M                  | 1 |  |
| TTN | NM_133378:c.A15092G;p.N5031S                  | 1 |  |
| TTN | NM_003319:c.G12770A;p.G4257D                  | 1 |  |

|     |                                             |   |                                                          |
|-----|---------------------------------------------|---|----------------------------------------------------------|
| TTN | NM_133379:c.G14492A:p.C4831Y                | 1 |                                                          |
| TTN | NM_133378:c.30508_30510del:p.10170_10170del | 1 |                                                          |
| TTN | NM_003319:c.C61405T:p.P20469S               | 1 |                                                          |
| TTN | NM_003319:c.C64111T:p.R21371W               | 1 |                                                          |
| TTN | NM_003319:c.C60274T:p.L20092F               | 1 |                                                          |
| TTN | NM_003319:c.G22676A:p.R7559Q                | 1 |                                                          |
| TTN | NM_003319:c.G8176A:p.V2726M                 | 1 |                                                          |
| TTN | NM_133378:c.A17270G:p.K5757R                | 1 |                                                          |
| TTN | NM_003319:c.A31229G:p.N10410S               | 1 |                                                          |
| TTN | NM_003319:c.G31441C:p.E10481Q               | 1 |                                                          |
| TTN | NM_003319:c.A45736G:p.T15246A               | 3 |                                                          |
| TTN | NM_003319:c.C26945T:p.A8982V                | 1 |                                                          |
| TTN | NM_003319:c.A54649G:p.K18217E               | 1 |                                                          |
| TTN | NM_003319:c.G57644T:p.G19215V               | 1 |                                                          |
| TTN | NM_003319:c.G13480A:p.V4494I                | 1 |                                                          |
| TTN | NM_003319:c.T5227G:p.S1743A                 | 1 |                                                          |
| TTN | NM_133378:c.G20425A:p.G6809S                | 1 |                                                          |
| TTN | NM_003319:c.G19707T:p.R6569S                | 1 |                                                          |
| TTN | NM_003319:c.G24796C:p.E8266Q                | 1 |                                                          |
| TTN | NM_003319:c.G26312A:p.R8771H                | 1 |                                                          |
| TTN | NM_133378:c.C28748T:p.A9583V                | 1 |                                                          |
| TTN | NM_003319:c.G19256A:p.R6419K                | 1 |                                                          |
| TTN | NM_133379:c.C13028A:p.T4343N                | 1 |                                                          |
| TTN | NM_003319:c.G58601A:p.R19534H               | 2 |                                                          |
| TTN | NM_003319:c.G19060T:p.A6354S                | 2 |                                                          |
| TTN | NM_003319:c.C60436T:p.R20146C               | 1 |                                                          |
| TTN | NM_003319:c.A51793G:p.S17265G               | 1 |                                                          |
| TTN | NM_003319:c.C78188T:p.A26063V               | 1 |                                                          |
| TTN | NM_003319:c.A47700C:p.Q15900H               | 1 |                                                          |
| TTN | NM_003319:c.G77056C:p.A25686P               | 2 |                                                          |
| TTN | NM_133379:c.C16321T:p.R5441X                | 1 |                                                          |
| TTN | NM_003319:c.C26729G:p.T8910S                | 1 |                                                          |
| TTN | NM_003319:c.G78524A:p.R26175Q               | 1 |                                                          |
| TTN | NM_133378:c.G27017A:p.R9006H                | 1 |                                                          |
| TTN | NM_133378:c.G25499A:p.R8500H                | 1 | Arimura T et al.<br>J Am Coll Cardiol 2009;54(4):334-42. |
| TTN | NM_003319:c.G56086A:p.V18696I               | 1 |                                                          |
| TTN | NM_003319:c.G25901A:p.R8634H                | 1 |                                                          |
| TTN | NM_003319:c.G32053A:p.G10685S               | 1 |                                                          |
| TTN | NM_003319:c.C39131T:p.P13044L               | 1 |                                                          |
| TTN | NM_003319:c.C54277G:p.P18093A               | 1 |                                                          |
| TTN | NM_003319:c.G3271C:p.G1091R                 | 2 |                                                          |
| TTN | NM_003319:c.G69409T:p.V23137L               | 1 |                                                          |
| TTN | NM_003319:c.G29752A:p.A9918T                | 1 |                                                          |
| TTN | NM_003319:c.C61199T:p.S20400F               | 3 |                                                          |
| TTN | NM_003319:c.T4258C:p.F1420L                 | 2 |                                                          |
| TTN | NM_003319:c.C18404G:p.A6135G                | 1 |                                                          |
| TTN | NM_003319:c.C62729T:p.A20910V               | 1 |                                                          |
| TTN | NM_003319:c.A7085G:p.Q2362R                 | 2 |                                                          |
| TTN | NM_003319:c.G73852A:p.E24618K               | 1 |                                                          |
| TTN | NM_003319:c.T54087A:p.H18029Q               | 1 |                                                          |
| TTN | NM_003319:c.A9689G:p.E3230G                 | 1 |                                                          |
| TTN | NM_003319:c.A58496T:p.K19499I               | 1 |                                                          |

|     |                                           |   |  |
|-----|-------------------------------------------|---|--|
| TTN | NM_003319:c.C74741G;p.P24914R             | 1 |  |
| TTN | NM_003319:c.G30488A;p.R10163H             | 1 |  |
| TTN | NM_133378:c.A30866G;p.E10289G             | 1 |  |
| TTN | NM_133379:c.C15122G;p.T5041R              | 1 |  |
| TTN | NM_003319:c.A61090G;p.I20364V             | 1 |  |
| TTN | NM_003319:c.T68527C;p.Y22843H             | 1 |  |
| TTN | NM_003319:c.16639_16644del;p.5547_5548del | 1 |  |
| TTN | NM_003319:c.T39904C;p.S13302P             | 1 |  |
| TTN | NM_003319:c.C25657T;p.R8553C              | 1 |  |
| TTN | NM_003319:c.G11659A;p.V3887M              | 1 |  |
| TTN | NM_003319:c.G55615A;p.G18539S             | 1 |  |
| TTN | NM_133378:c.G16579C;p.E5527Q              | 1 |  |
| TTN | NM_133378:c.T32555C;p.V10852A             | 1 |  |
| TTN | NM_003319:c.G18785A;p.R6262H              | 1 |  |
| TTN | NM_003319:c.G23990A;p.S7997N              | 1 |  |
| TTN | NM_133378:exon99:c.25310-2A>C             | 1 |  |
| TTN | NM_133437:exon9:c.1398+4C>T               | 1 |  |
| TTN | NM_133437:exon156:c.43097-5C>G            | 2 |  |
| TTN | NM_133437:exon44:c.9977-4G>A              | 1 |  |
| TTN | NM_133437:exon179:c.70574-3T>C            | 1 |  |
| VCL | NM_003373:c.G1237A;p.A413T                | 1 |  |
| VCL | NM_003373:c.A1166G;p.D389G                | 2 |  |
| VCL | NM_003373:c.A1907G;p.H636R                | 1 |  |
| VCL | NM_003373:c.T1973C;p.V658A                | 1 |  |
| VCL | NM_003373:c.A1157G;p.K386R                | 1 |  |
| VCL | NM_003373:c.A1555C;p.I519L                | 1 |  |

Table S2. Rare nsSNPs frequency comparison between our sequencing results and a set of 1,287 UK controls with exome sequence data generated by the UK10K project ([www.uk10k.org](http://www.uk10k.org)) for 19 HCM/DCM associated genes. To avoid technical artifacts associated with indel calling, and to properly match cases and controls, we restricted this analysis to nsSNPs and the 180 HCM UK Caucasian HCM cases. The columns show: the proportion of the 1,287 UK controls with exome sequence data generated by the UK10K project ([www.uk10k.org](http://www.uk10k.org)) and 180 HCM cases that carry rare nsSNPs (rare defined by frequency less than 0.5% in the 1000 Genomes dataset), a Fisher exact test P-value to quantify the case-control difference, the 95% confidence interval for the estimated proportion of HCM cases explained by rare nsSNPs variants in each gene (Supplemental statistical methods), and (in the rightmost column) the estimated probability that a rare nsSNP found in a HCM case in each gene is disease causing (Supplemental statistical methods).

nsSNP: nonsynonymous single nucleotide polymorphism; CI: confidence interval.

| Gene          | Rare nsSNPs – Frequency in controls | Rare nsSNPs – Frequency in patients | P-value  | 95% CI for the proportion of cases explained | Probability that a nsSNP is causal |
|---------------|-------------------------------------|-------------------------------------|----------|----------------------------------------------|------------------------------------|
| <i>MYH7</i>   | 0.025                               | 0.172                               | 3.86E-13 | [0.0964-0.207]                               | 0.856                              |
| <i>TNNT2</i>  | 0.003                               | 0.044                               | 8.41E-05 | [0.0136-0.0708]                              | 0.930                              |
| <i>TNNI3</i>  | 0.000                               | 0.017                               | 0.002    | [0.00333-0.0415]                             | 1.000                              |
| <i>MYBPC3</i> | 0.045                               | 0.106                               | 0.007    | [0.014-0.104]                                | 0.570                              |
| <i>PLN</i>    | 0.001                               | 0.022                               | 0.001    | [0.006-0.0498]                               | 0.965                              |
| <i>MYL2</i>   | 0.007                               | 0.022                               | 0.065    | [0-0.044]                                    | NA                                 |
| <i>MYL3</i>   | 0.004                               | 0.011                               | 0.208    | [0-0.0301]                                   | NA                                 |
| <i>ACTC1</i>  | 0.001                               | 0.006                               | 0.230    | [0-0.0167]                                   | NA                                 |
| <i>TPM1</i>   | 0.000                               | 0.006                               | 0.123    | [0-0.0167]                                   | NA                                 |
| <i>CSRP3</i>  | 0.012                               | 0.028                               | 0.168    | [0-0.0467]                                   | NA                                 |
| <i>MYH6</i>   | 0.053                               | 0.056                               | 0.608    | [0-0.0501]                                   | NA                                 |
| <i>DES</i>    | 0.005                               | 0.011                               | 0.256    | [0-0.0294]                                   | NA                                 |
| <i>TNNC1</i>  | 0.000                               | 0.000                               | 1.000    | [0-0]                                        | NA                                 |
| <i>LDB3</i>   | 0.012                               | 0.011                               | 1.000    | [0-0.0228]                                   | NA                                 |
| <i>TCAP</i>   | 0.004                               | 0.000                               | 1.000    | [0-0]                                        | NA                                 |
| <i>LMNA</i>   | 0.005                               | 0.000                               | 1.000    | [0-0]                                        | NA                                 |
| <i>RBM20</i>  | 0.061                               | 0.056                               | 0.871    | [0-0.0361]                                   | NA                                 |
| <i>PDLIM3</i> | 0.011                               | 0.000                               | 0.241    | [0-0]                                        | NA                                 |
| <i>VCL</i>    | 0.038                               | 0.028                               | 0.677    | [0-0.0244]                                   | NA                                 |

Table S3. Rare nsSNPs frequency comparison between our sequencing results and a set of 1,287 UK controls with exome sequence data generated by the UK10K project ([www.uk10k.org](http://www.uk10k.org)) for genes associated with arrhythmogenic right ventricular cardiomyopathy and ion channel disease. To avoid technical artifacts associated with indel calling, and to properly match cases and controls, we restricted this analysis to nsSNPs and the 180 HCM UK Caucasian HCM cases. The columns show: the proportion of the 1,287 UK controls with exome sequence data generated by the UK10K project ([www.uk10k.org](http://www.uk10k.org)) and 180 HCM cases that carry rare nsSNPs (rare defined by frequency less than 0.5% in the 1000 Genomes dataset), a Fisher exact test P-value to quantify the case-control difference, the 95% confidence interval for the estimated proportion of HCM cases explained by rare nsSNPs variants in each gene (Supplemental statistical methods), and (in the rightmost column) the estimated probability that a rare nsSNP found in a HCM case in each gene is disease causing (Supplemental statistical methods).

nsSNP: nonsynonymous single nucleotide polymorphism; CI: confidence interval.

| Gene          | Rare nsSNPs - Frequency in controls | Rare nsSNPs - Frequency in patients | P-value | 95% CI for the proportion of cases explained | Probability that a nsSNP is causal |
|---------------|-------------------------------------|-------------------------------------|---------|----------------------------------------------|------------------------------------|
| <i>DSP</i>    | 0.040                               | 0.061                               | 0.240   | [0-0.0629]                                   | NA                                 |
| <i>ANK2</i>   | 0.039                               | 0.044                               | 0.690   | [0-0.0427]                                   | NA                                 |
| <i>DSG2</i>   | 0.040                               | 0.044                               | 0.842   | [0-0.0418]                                   | NA                                 |
| <i>KCNE1</i>  | 0.004                               | 0.006                               | 0.544   | [0-0.0167]                                   | NA                                 |
| <i>KCNQ1</i>  | 0.012                               | 0.011                               | 1.000   | [0-0.0228]                                   | NA                                 |
| <i>CAV3</i>   | 0.001                               | 0.000                               | 1.000   | [0-0]                                        | NA                                 |
| <i>TGFB3</i>  | 0.002                               | 0.000                               | 1.000   | [0-0]                                        | NA                                 |
| <i>KCNJ2</i>  | 0.003                               | 0.000                               | 1.000   | [0-0]                                        | NA                                 |
| <i>JUP</i>    | 0.014                               | 0.011                               | 1.000   | [0-0.0209]                                   | NA                                 |
| <i>SCN5A</i>  | 0.043                               | 0.039                               | 1.000   | [0-0.0319]                                   | NA                                 |
| <i>CASQ2</i>  | 0.006                               | 0.000                               | 0.607   | [0-0]                                        | NA                                 |
| <i>DSC2</i>   | 0.034                               | 0.028                               | 0.828   | [0-0.0267]                                   | NA                                 |
| <i>TMEM43</i> | 0.013                               | 0.006                               | 0.716   | [0-0.0149]                                   | NA                                 |
| <i>KCNH2</i>  | 0.014                               | 0.006                               | 0.500   | [0-0.0147]                                   | NA                                 |
| <i>KCNE2</i>  | 0.019                               | 0.000                               | 0.064   | [0-0]                                        | NA                                 |
| <i>PKP2</i>   | 0.049                               | 0.028                               | 0.264   | [0-0.02]                                     | NA                                 |
| <i>RYR2</i>   | 0.068                               | 0.028                               | 0.037   | [0-0.0161]                                   | NA                                 |

Table S4. Combinations of variants in patients with complex genotypes.

| Patient | Gene          | Variant                                       |
|---------|---------------|-----------------------------------------------|
| H2      | <i>MYH7</i>   | NM_000257:c.G767A:p.G256E                     |
|         | <i>TTN</i>    | NM_003319:c.C59039T:p.A19680V                 |
|         | <i>TTN</i>    | NM_003319:c.C61509A:p.H20503Q                 |
| H4      | <i>MYH6</i>   | NM_002471:c.G622A:p.D208N                     |
|         | <i>PLN</i>    | NM_002667:c.G26A:p.R9H                        |
|         | <i>TTN</i>    | NM_003319:c.C53597T:p.T17866I                 |
| H5      | <i>ANK2</i>   | NM_001148:c.G7132A:p.E2378K                   |
|         | <i>DSP</i>    | NM_004415:c.A5363G:p.Q1788R                   |
|         | <i>LMNA</i>   | NM_170708:c.C1840T:p.R614C                    |
| H9      | <i>TCAP</i>   | NM_003673:c.G4A:p.A2T                         |
|         | <i>TTN</i>    | NM_003319:c.C60217A:p.P20073T                 |
|         | <i>TTN</i>    | NM_133378:c.G17911A:p.A5971T                  |
| H10     | <i>TTN</i>    | NM_133437:exon9:c.1398+4C>T                   |
|         | <i>MYH7</i>   | NM_000257:c.C2167T:p.R723C                    |
|         | <i>TTN</i>    | NM_003319:c.T20954G:p.V6985G                  |
| H11     | <i>ANK2</i>   | NM_001148:c.A4373G:p.E1458G                   |
|         | <i>MYBPC3</i> | NM_000256:c.3596_3605del:p.1199_1202del       |
|         | <i>TTN</i>    | NM_133378:exon120:c.28031-1G>A                |
| H12     | <i>ANK2</i>   | NM_001148:c.C9872G:p.P3291R                   |
|         | <i>MYH7</i>   | NM_000257:c.G746A:p.R249Q                     |
|         | <i>TTN</i>    | NM_133378:c.29769_29770insAGA:p.V9923delinsVE |
|         | <i>TTN</i>    | NM_133378:c.A11831C:p.Q3944P                  |
|         | <i>TTN</i>    | NM_133378:c.A21241G:p.K7081E                  |
| H13     | <i>DSG2</i>   | NM_001943:c.A2110G:p.I704V                    |
|         | <i>MYH7</i>   | NM_000257:c.G1063A:p.A355T                    |
| H14     | <i>MYBPC3</i> | NA(NM_000256:exon17:c.1624+4A>T)              |
|         | <i>RBM20</i>  | NM_001134363:c.G850A:p.G284R                  |
|         | <i>TMEM43</i> | NM_024334:c.G91A:p.E31K                       |
|         | <i>TTN</i>    | NM_003319:c.C76097T:p.T25366M                 |
| H15     | <i>ANK2</i>   | NM_001148:c.A6883G:p.T2295A                   |
|         | <i>MYL2</i>   | NM_000432:c.A401C:p.E134A                     |
| H16     | <i>DES</i>    | NM_001927:c.G1286A:p.R429Q                    |
|         | <i>LDB3</i>   | NM_001080115:c.G352A:p.V118M                  |
|         | <i>MYH7</i>   | NM_000257:c.G2389A:p.A797T                    |
|         | <i>TTN</i>    | NM_133378:c.29769_29770insAGA:p.V9923delinsVE |
|         | <i>TTN</i>    | NM_133378:c.G17632A:p.A5878T                  |
| H19     | <i>MYBPC3</i> | NM_000256:c.C3811T:p.R1271X                   |
|         | <i>PKP4</i>   | NM_001005476:c.C2120T:p.A707V                 |
|         | <i>SCN5A</i>  | NM_198056.2:c.C3749T:p.T1304M                 |
|         | <i>TTN</i>    | NM_003319:c.G55868A:p.R18623H                 |
| H20     | <i>TNNT2</i>  | NM_001001432:c.G842A:p.W287X                  |
|         | <i>TTN</i>    | NM_003319:c.A42481G:p.S14161G                 |
|         | <i>TTN</i>    | NM_003319:c.G20528A:p.R6843H                  |
|         | <i>TTN</i>    | NM_003319:c.G62191A:p.V20731M                 |
|         | <i>TTN</i>    | NM_003319:c.T68075C:p.I22692T                 |
|         | <i>TTN</i>    | NM_133379:c.A13936G:p.K4646E                  |
| H21     | <i>PKP2</i>   | NM_001005242:c.C485T:p.T162M                  |
|         | <i>TTN</i>    | NM_003319:c.A755G:p.K252R                     |
| H24     | <i>DSP</i>    | NM_001008844:c.G1445A:p.C482Y                 |

|     |               |                                               |
|-----|---------------|-----------------------------------------------|
|     | <i>TTN</i>    | NM_003319:c.A30247G:p.M10083V                 |
| H25 | <i>DSC2</i>   | NM_004949:c.T2194G:p.L732V                    |
|     | <i>DSG2</i>   | NM_001943:c.G1174A:p.V392I                    |
|     | <i>MYBPC3</i> | NM_000256:exon13:c.1090+1G>T                  |
|     | <i>TNNT2</i>  | NM_001001432:c.C814T:p.R278C                  |
|     | <i>VCL</i>    | NM_003373:c.G1237A:p.A413T                    |
| H26 | <i>TPM1</i>   | NM_000366:exon4:c.375-3C>T                    |
|     | <i>MYH6</i>   | NM_002471:c.C5410A:p.Q1804K                   |
|     | <i>TTN</i>    | NM_003319:c.C19652T:p.T6551M                  |
|     | <i>TTN</i>    | NM_003319:c.C78211T:p.R26071W                 |
|     | <i>TTN</i>    | NM_003319:c.T69794C:p.I23265T                 |
|     | <i>TTN</i>    | NM_133378:c.A31491T:p.E10497D                 |
| H27 | <i>MYH7</i>   | NM_000257:c.A2681G:p.E894G                    |
|     | <i>TTN</i>    | NM_003319:c.G18213T:p.K6071N                  |
| H28 | <i>SCN5A</i>  | NM_000335:c.G496A:p.A166T                     |
|     | <i>TTN</i>    | NM_003319:c.C41935T:p.P13979S                 |
|     | <i>TTN</i>    | NM_003319:c.G22882A:p.V7628I                  |
| H29 | <i>MYBPC3</i> | NM_000256:c.3580_3591del:p.1194_1197del       |
|     | <i>MYBPC3</i> | NM_000256:c.C3771A:p.N1257K                   |
|     | <i>MYL2</i>   | NM_000432:c.G37A:p.A13T                       |
|     | <i>PKP2</i>   | NM_001005242:c.T1809G:p.C603W                 |
|     | <i>TTN</i>    | NM_003319:c.G26749A:p.E8917K                  |
| H30 | <i>MYH7</i>   | NM_000257:c.G1988A:p.R663H                    |
|     | <i>TNNT2</i>  | NM_001001432:c.C296T:p.A104V                  |
|     | <i>TTN</i>    | NM_133378:c.A11831C:p.Q3944P                  |
|     | <i>TTN</i>    | NM_133378:c.A21241G:p.K7081E                  |
|     | <i>TTN</i>    | NM_133378:c.C29126T:p.A9709V                  |
| H32 | <i>DES</i>    | NM_001927:exon3:c.640-4C>G                    |
|     | <i>DSP</i>    | NM_001008844:c.G4084A:p.V1362I                |
|     | <i>MYBPC3</i> | NM_000256:c.3333_3334insGTG:p.E1111delinsEW   |
|     | <i>VCL</i>    | NM_003373:c.A1166G:p.D389G                    |
| H35 | <i>CSRP3</i>  | NM_001127656:c.G449A:p.C150Y                  |
|     | <i>TTN</i>    | NM_003319:c.G38395C:p.D12799H                 |
|     | <i>TTN</i>    | NM_133378:c.29769_29770insAGA:p.V9923delinsVE |
| H37 | <i>MYBPC3</i> | NM_000256:c.G2497A:p.A833T                    |
|     | <i>MYH7</i>   | NM_000257:c.T1433A:p.I478N                    |
|     | <i>TTN</i>    | NM_003319:c.C65429G:p.A21810G                 |
| H38 | <i>MYH7</i>   | NM_000257:c.G1988A:p.R663H                    |
|     | <i>TNNT2</i>  | NM_001001432:c.C296T:p.A104V                  |
|     | <i>TTN</i>    | NM_133378:c.A11831C:p.Q3944P                  |
|     | <i>TTN</i>    | NM_133378:c.A21241G:p.K7081E                  |
|     | <i>TTN</i>    | NM_133378:c.C29126T:p.A9709V                  |
| H41 | <i>DSC2</i>   | NM_024422:c.2685_2686insAG:p.A895fs           |
|     | <i>TTN</i>    | NM_003319:c.T64415A:p.I21472N                 |
| H45 | <i>DSC2</i>   | NM_004949:c.T2194G:p.L732V                    |
|     | <i>DSG2</i>   | NM_001943:c.G1174A:p.V392I                    |
|     | <i>TNNI3</i>  | NM_000363:c.G526A:p.V176M                     |
| H47 | <i>MYBPC3</i> | NM_000256:exon13:c.1090+1G>A                  |
|     | <i>TTN</i>    | NM_003319:c.A30554C:p.Q10185P                 |
|     | <i>TTN</i>    | NM_003319:c.C71099G:p.A23700G                 |
|     | <i>TTN</i>    | NM_003319:c.G34727A:p.R11576Q                 |
|     | <i>TTN</i>    | NM_133379:c.G16160A:p.C5387Y                  |

|     |        |                                               |
|-----|--------|-----------------------------------------------|
|     | VCL    | NM_003373:c.A1907G:p.H636R                    |
| H48 | LDB3   | NM_001080115:c.G352A:p.V118M                  |
|     | MYBPC3 | NM_000256:c.C3771A:p.N1257K                   |
|     | MYL2   | NM_000432:c.G37A:p.A13T                       |
|     | PKP2   | NM_001005242:c.T1809G:p.C603W                 |
| H51 | DSP    | NM_001008844:c.1_2insA:p.M1fs                 |
|     | MYBPC3 | NM_000256:c.2512_2513insG:p.E838fs            |
| H52 | MYBPC3 | NM_000256:c.C1504T:p.R502W                    |
|     | TNNT2  | NM_001001432:c.C296T:p.A104V                  |
| H53 | DSG2   | NM_001943:c.G166A:p.V56M                      |
|     | TNNT2  | NM_001001432:c.A562G:p.T194A                  |
|     | TTN    | NM_133378:c.29769_29770insAGA:p.V9923delinsVE |
|     | TTN    | NM_133378:c.29783_29784insAAT:p.E9928delinsEX |
| H54 | TMEM43 | NM_024334:exon3:c.163-3C>-                    |
|     | MYH6   | NM_002471:c.C245T:p.P82L                      |
|     | MYH6   | NM_002471:c.C70A:p.L24I                       |
|     | PDLIM3 | NM_001114107:c.A883G:p.T295A                  |
|     | RBM20  | NM_001134363:c.C3266G:p.P1089R                |
|     | TTN    | NM_003319:c.A4221T:p.R1407S                   |
|     | TTN    | NM_003319:c.A7620G:p.I2540M                   |
|     | TTN    | NM_003319:c.C4151A:p.A1384E                   |
| H55 | DSP    | NM_001008844:c.1_2insA:p.M1fs                 |
|     | LDB3   | NM_001080115:c.G352A:p.V118M                  |
|     | TTN    | NM_003319:c.A64406T:p.D21469V                 |
|     | TTN    | NM_003319:c.G2962A:p.V988M                    |
|     | TTN    | NM_133378:c.C15300G:p.D5100E                  |
| H56 | MYBPC3 | NM_000256:c.2524_2525insT:p.Y842fs            |
|     | TTN    | NM_133378:c.A22762G:p.I7588V                  |
|     | TTN    | NM_133378:c.G16609A:p.E5537K                  |
| H58 | MYH7   | NM_000257:c.G1144T:p.D382Y                    |
|     | RYR2   | NM_001035:c.G8274T:p.K2758N                   |
| H59 | CASQ2  | NM_001232:c.1183_1185del:p.395_395del         |
|     | MYH7   | NM_000257:c.T2945C:p.M982T                    |
|     | TNNI3  | NM_000363:c.G586A:p.D196N                     |
|     | TTN    | NM_003319:c.C44513G:p.A14838G                 |
|     | TTN    | NM_003319:c.G38281A:p.E12761K                 |
|     | TTN    | NM_003319:c.G42626A:p.G14209D                 |
| H60 | MYBPC3 | NM_000256:c.G3065C:p.R1022P                   |
|     | RBM20  | NM_001134363:c.G850A:p.G284R                  |
|     | TTN    | NM_133379:c.T16469C:p.L5490S                  |
| H61 | TTN    | NM_003319:c.A42481G:p.S14161G                 |
|     | TTN    | NM_003319:c.G20528A:p.R6843H                  |
|     | TTN    | NM_003319:c.G41263C:p.A13755P                 |
|     | TTN    | NM_133379:c.A13936G:p.K4646E                  |
| H62 | RYR2   | NM_001035:c.G3038A:p.R1013Q                   |
|     | TTN    | NM_003319:c.G18213T:p.K6071N                  |
|     | TTN    | NM_133378:c.G21088A:p.E7030K                  |
| H63 | MYBPC3 | NM_000256:c.G961A:p.V321M                     |
|     | MYH7   | NM_000257:c.A1051G:p.K351E                    |
|     | TNNI3  | NM_000363:c.G526A:p.V176M                     |
|     | TTN    | NM_003319:c.C19698G:p.D6566E                  |
| H64 | MYH7   | NM_000257:c.2537_2539del:p.846_847del         |

|     |               |                                       |
|-----|---------------|---------------------------------------|
|     | <i>TTN</i>    | NM_003319:c.A12505G:p.T4169A          |
| H65 | <i>ANK2</i>   | NM_001148:c.C2819G:p.A940G            |
|     | <i>MYBPC3</i> | NM_000256:c.459delC:p.P153fsX5        |
| H66 | <i>MYBPC3</i> | NM_000256:c.G977A:p.R326Q             |
|     | <i>MYH7</i>   | NM_000257:c.A2717G:p.D906G            |
| H68 | <i>CASQ2</i>  | NM_001232:c.1132_1134del:p.378_378del |
|     | <i>DSP</i>    | NM_001008844:c.C2422T:p.R808C         |
|     | <i>LDB3</i>   | NM_001080114:c.G459C:p.Q153H          |
|     | <i>RBM20</i>  | NM_001134363:c.G3373A:p.E1125K        |
|     | <i>TTN</i>    | NM_133378:c.G19937T:p.R6646I          |
| H69 | <i>MYH7</i>   | NM_000257:c.A2669C:p.Q890P            |
|     | <i>TTN</i>    | NM_003319:c.T44951C:p.L14984P         |
| H70 | <i>PKP4</i>   | NM_001005476:c.A1879G:p.I627V         |
|     | <i>TNNT2</i>  | NM_001001432:c.G266A:p.R94H           |
|     | <i>TTN</i>    | NM_003319:c.G49167A:p.M16389I         |
|     | <i>TTN</i>    | NM_003319:c.G55868A:p.R18623H         |
| H71 | <i>MYBPC3</i> | NM_000256:c.G1484A:p.R495Q            |
|     | <i>TTN</i>    | NM_003319:c.C77066T:p.A25689V         |
|     | <i>TTN</i>    | NM_003319:c.G60895A:p.G20299S         |
| H72 | <i>DES</i>    | NM_001927:c.A616G:p.N206D             |
|     | <i>DSC2</i>   | NM_024422:c.2685_2686insAG:p.A895fs   |
|     | <i>TTN</i>    | NM_003319:c.C3910T:p.R1304C           |
| H74 | <i>DSP</i>    | NM_004415:c.C5178A:p.N1726K           |
|     | <i>PKP2</i>   | NM_001005242:c.A1372G:p.I458V         |
|     | <i>TTN</i>    | NM_003319:c.G3250C:p.V1084L           |
| H75 | <i>MYBPC3</i> | NM_000256:exon17:c.1624+4A>T          |
|     | <i>TTN</i>    | NM_003319:c.A13241C:p.E4414A          |
|     | <i>TTN</i>    | NM_003319:c.C71099G:p.A23700G         |
|     | <i>TTN</i>    | NM_003319:c.G34727A:p.R11576Q         |
|     | <i>TTN</i>    | NM_003319:c.G77051A:p.R25684Q         |
|     | <i>TTN</i>    | NM_133379:c.G16160A:p.C5387Y          |
| H77 | <i>DSG2</i>   | NM_001943:c.A1376G:p.Y459C            |
|     | <i>KCNQ1</i>  | NM_000218:c.G1179T:p.K393N            |
|     | <i>PKP4</i>   | NM_001005476:c.C3233G:p.S1078C        |
|     | <i>TNNT2</i>  | NM_001001432:c.C259T:p.R92W           |
|     | <i>TTN</i>    | NM_003319:c.A75400G:p.I25134V         |
|     | <i>TTN</i>    | NM_003319:c.C20350A:p.P6784T          |
|     | <i>TTN</i>    | NM_003319:c.C55365A:p.N18455K         |
|     | <i>TTN</i>    | NM_003319:c.C68102T:p.S22701F         |
|     | <i>TTN</i>    | NM_003319:c.G12770A:p.G4257D          |
|     | <i>TTN</i>    | NM_003319:c.G22724C:p.S7575T          |
|     | <i>TTN</i>    | NM_003319:c.G37594A:p.V12532M         |
|     | <i>TTN</i>    | NM_003319:c.G63341A:p.R21114H         |
|     | <i>TTN</i>    | NM_003319:c.G64570A:p.A21524T         |
|     | <i>TTN</i>    | NM_003319:c.G74696A:p.R24899H         |
|     | <i>TTN</i>    | NM_003319:c.T63631G:p.C21211G         |
|     | <i>TTN</i>    | NM_133378:c.A15092G:p.N5031S          |
|     | <i>TTN</i>    | NM_133378:c.A16443G:p.I5481M          |
|     | <i>TTN</i>    | NM_133378:c.A30663C:p.E10221D         |
|     | <i>TTN</i>    | NM_133378:c.C19806G:p.F6602L          |
|     | <i>TTN</i>    | NM_133378:c.G21758A:p.R7253H          |
|     | <i>TTN</i>    | NM_133379:c.G14492A:p.C4831Y          |

|     |        |                                               |
|-----|--------|-----------------------------------------------|
| H79 | CASQ2  | NM_001232:c.1183_1185del:p.395_395del         |
|     | TTN    | NM_003319:c.C61405T:p.P20469S                 |
|     | TTN    | NM_003319:c.C64111T:p.R21371W                 |
| H80 | MYBPC3 | NM_000256:c.3227_3228insT:p.D1076fs           |
|     | TCAP   | NM_003673:c.37_39del:p.13_13del               |
| H81 | PDLIM3 | NM_014476:c.G547T:p.V183L                     |
|     | PKP4   | NM_001005476:c.C956T:p.T319M                  |
|     | TTN    | NM_003319:c.A31229G:p.N10410S                 |
|     | TTN    | NM_003319:c.C60274T:p.L20092F                 |
|     | TTN    | NM_003319:c.G22676A:p.R7559Q                  |
|     | TTN    | NM_003319:c.G31441C:p.E10481Q                 |
|     | TTN    | NM_003319:c.G8176A:p.V2726M                   |
|     | TTN    | NM_133378:c.A17270G:p.K5757R                  |
|     | TTN    | NM_133378:exon99:c.25310-2A>C                 |
| H82 | MYH7   | NM_000257:c.G2156A:p.R719Q                    |
|     | PNN    | NM_002687:c.C914T:p.A305V                     |
|     | TTN    | NM_003319:c.A45736G:p.T15246A                 |
|     | TTN    | NM_003319:c.C26945T:p.A8982V                  |
| H83 | MYH7   | NM_000257:c.G5342A:p.R1781H                   |
|     | TTN    | NM_003319:c.A54649G:p.K18217E                 |
| H84 | ANK2   | NM_001127493:exon28:c.2838-4G>A               |
|     | DSG2   | NM_001943:c.C121A:p.H41N                      |
|     | DSP    | NM_001008844:c.1_2insA:p.M1fs                 |
|     | DSP    | NM_004415:c.A3706G:p.R1236G                   |
| H85 | RBM20  | NM_001134363:c.G850A:p.G284R                  |
|     | TTN    | NM_003319:c.G13480A:p.V4494I                  |
|     | TTN    | NM_003319:c.G57644T:p.G19215V                 |
|     | TTN    | NM_003319:c.T5227G:p.S1743A                   |
| H86 | MYBPC3 | NM_000256:c.3621delC:p.S1207fs                |
|     | TTN    | NM_133378:c.G20425A:p.G6809S                  |
| H87 | MYBPC3 | NM_000256:c.2373_2374insG:p.Q791fs            |
|     | TTN    | NM_133378:c.29769_29770insAGA:p.V9923delinsVE |
| H88 | CAV3   | NM_001234:c.C216G:p.C72W                      |
|     | DSP    | NM_001008844:c.1_2insA:p.M1fs                 |
|     | MYBPC3 | NM_000256:c.2373_2374insG:p.Q791fs            |
|     | RYR2   | NM_001035:c.G5102C:p.G1701A                   |
| H89 | ANK2   | NM_001148:c.G4745A:p.R1582Q                   |
|     | MYBPC3 | NM_000256:c.G1471A:p.V491M                    |
|     | RBM20  | NM_001134363:c.G3373A:p.E1125K                |
| H90 | MYBPC3 | NM_000256:c.G2429A:p.R810H                    |
|     | MYH6   | NM_002471:c.G5476A:p.G1826S                   |
|     | MYH6   | NM_002471:c.G5477A:p.G1826D                   |
|     | TTN    | NM_003319:c.G19707T:p.R6569S                  |
| H91 | MYBPC3 | NM_000256:c.C2827T:p.R943X                    |
|     | PKP4   | NM_001005476:c.C3233G:p.S1078C                |
|     | TTN    | NM_003319:c.A42481G:p.S14161G                 |
|     | TTN    | NM_003319:c.G20528A:p.R6843H                  |
|     | TTN    | NM_003319:c.G62191A:p.V20731M                 |
|     | TTN    | NM_003319:c.T68075C:p.I22692T                 |
|     | TTN    | NM_133379:c.A13936G:p.K4646E                  |
| H92 | ANK2   | NM_020977:c.G5536A:p.E1846K                   |
|     | MYH7   | NM_000257:c.C1279A:p.L427M                    |

|      |               |                                       |
|------|---------------|---------------------------------------|
| H93  | <i>MYH6</i>   | NM_002471:c.C5644A:p.R1882S           |
|      | <i>TTN</i>    | NM_003319:c.A30247G:p.M10083V         |
| H94  | <i>JUP</i>    | NM_002230:c.C1096G:p.P366A            |
|      | <i>TTN</i>    | NM_003319:c.A45736G:p.T15246A         |
| H95  | <i>DSP</i>    | NM_004415.2:c.C6482T:p.A2760V         |
|      | <i>RBM20</i>  | NM_001134363:c.C2213T:p.P738L         |
|      | <i>RBM20</i>  | NM_001134363:c.C2239T:p.H747Y         |
|      | <i>TTN</i>    | NM_003319:c.G24796C:p.E8266Q          |
|      | <i>TTN</i>    | NM_003319:c.G26312A:p.R8771H          |
| H96  | <i>CASQ2</i>  | NM_001232:c.1183_1185del:p.395_395del |
|      | <i>DSP</i>    | NM_001008844:c.1_2insA:p.M1fs         |
|      | <i>MYBPC3</i> | NM_000256:exon27:c.2905+1G>A          |
|      | <i>TTN</i>    | NM_003319:c.G19256A:p.R6419K          |
|      | <i>TTN</i>    | NM_133378:c.C28748T:p.A9583V          |
| H97  | <i>DSC2</i>   | NM_004949:c.G2287A:p.A763T            |
|      | <i>MYBPC3</i> | NM_000256:c.C1302A:p.Y434X            |
|      | <i>TTN</i>    | NM_133379:c.C13028A:p.T4343N          |
| H98  | <i>ANK2</i>   | NM_001148:c.C5231T:p.A1744V           |
|      | <i>MYH6</i>   | NM_002471:c.C3932T:p.T1311I           |
|      | <i>TTN</i>    | NM_003319:c.G19060T:p.A6354S          |
|      | <i>TTN</i>    | NM_003319:c.G58601A:p.R19534H         |
| H99  | <i>MYBPC3</i> | NM_000256:c.C1504T:p.R502W            |
|      | <i>TTN</i>    | NM_003319:c.G18213T:p.K6071N          |
|      | <i>TTN</i>    | NM_133378:c.G21088A:p.E7030K          |
| H100 | <i>TTN</i>    | NM_003319:c.A42481G:p.S14161G         |
|      | <i>TTN</i>    | NM_003319:c.G20528A:p.R6843H          |
| H101 | <i>ANK2</i>   | NM_001148:c.C5914A:p.Q1972K           |
|      | <i>ANK2</i>   | NM_020977:c.G5536A:p.E1846K           |
|      | <i>TTN</i>    | NM_003319:c.C60217A:p.P20073T         |
|      | <i>TTN</i>    | NM_003319:c.C60436T:p.R20146C         |
| H103 | <i>MYH7</i>   | NM_000257:c.A2792G:p.E931G            |
|      | <i>TTN</i>    | NM_003319:c.A51793G:p.S17265G         |
|      | <i>TTN</i>    | NM_003319:c.C78188T:p.A26063V         |
|      | <i>VCL</i>    | NM_003373:c.T1973C:p.V658A            |
| H104 | <i>DSP</i>    | NM_004415.2:c.T5835G:p.F2544L         |
|      | <i>RYR2</i>   | NM_001035:c.G9455T:p.R3152L           |
| H105 | <i>MYBPC3</i> | NM_000256:c.2093delC:p.A698fs         |
| H106 | <i>CSRP3</i>  | NM_001127656:c.T10C:p.W4R             |
|      | <i>PLN</i>    | NM_002667:c.T152C:p.L51P              |
|      | <i>TTN</i>    | NM_133378:c.G18902A:p.R6301Q          |
| H107 | <i>TTN</i>    | NM_003319:c.A42481G:p.S14161G         |
|      | <i>TTN</i>    | NM_003319:c.A47700C:p.Q15900H         |
| H108 | <i>DSC2</i>   | NM_004949:c.G304A:p.E102K             |
|      | <i>TTN</i>    | NM_003319:c.G77056C:p.A25686P         |
|      | <i>TTN</i>    | NM_133379:c.C16321T:p.R5441X          |
| H109 | <i>TTN</i>    | NM_003319:c.C26729G:p.T8910S          |
|      | <i>TTN</i>    | NM_003319:c.G78524A:p.R26175Q         |
| H110 | <i>MYH6</i>   | NM_002471:c.C3427T:p.R1143W           |
|      | <i>SCN5A</i>  | NM_000335:c.A619G:p.T207A             |
|      | <i>TTN</i>    | NM_133378:c.G27017A:p.R9006H          |
| H111 | <i>DSC2</i>   | NM_004949:c.G304A:p.E102K             |
|      | <i>MYH7</i>   | NM_000257:c.G50A:p.R17H               |

|      |               |                                          |
|------|---------------|------------------------------------------|
|      | <i>MYH7</i>   | NM_000257:c.A2783G:p.D928G               |
|      | <i>PKP2</i>   | NM_001005242:c.G302A:p.R101H             |
| H112 | <i>MYBPC3</i> | NM_000256:c.C1483G:p.R495G               |
|      | <i>MYBPC3</i> | NM_000256:c.C3572T:p.S1191L              |
|      | <i>TTN</i>    | NM_003319:c.G56086A:p.V18696I            |
|      | <i>TTN</i>    | NM_133378:c.G25499A:p.R8500H             |
| H113 | <i>SCN5A</i>  | NM_001160161:exon25:c.4275+4C>T          |
|      | <i>SCN5A</i>  | NM_001099405:c.G5306A:p.S1769N           |
| H114 | <i>RBM20</i>  | NM_001134363:c.C1364T:p.S455L            |
|      | <i>TTN</i>    | NM_003319:c.G25901A:p.R8634H             |
|      | <i>TTN</i>    | NM_003319:c.G32053A:p.G10685S            |
| H116 | <i>CSRP3</i>  | NM_001127656:exon6:c.415-1G>T            |
|      | <i>RBM20</i>  | NM_001134363:c.G3373A:p.E1125K           |
|      | <i>RYR2</i>   | NM_001035:c.C2080T:p.R694X               |
|      | <i>TTN</i>    | NM_003319:c.C39131T:p.P13044L            |
| H117 | <i>ANK2</i>   | NM_001148:c.C5231A:p.A1744D              |
|      | <i>KCNH2</i>  | NM_001204798:c.1280_1281del:p.427_427del |
|      | <i>RYR2</i>   | NM_001035:exon39:c.5917-1G>C             |
|      | <i>TTN</i>    | NM_003319:c.C54277G:p.P18093A            |
|      | <i>TTN</i>    | NM_003319:c.G3271C:p.G1091R              |
| H118 | <i>ANK2</i>   | NM_020977:c.G5536A:p.E1846K              |
|      | <i>MYBPC3</i> | NM_000256:c.G1484A:p.R495Q               |
|      | <i>RYR2</i>   | NM_001035:exon20:c.2203+5G>A             |
|      | <i>TTN</i>    | NM_003319:c.A77579C:p.E25860A            |
|      | <i>TTN</i>    | NM_133378:c.C25001T:p.T8334M             |
| H119 | <i>MYL3</i>   | NM_000258:c.C460T:p.R154C                |
|      | <i>TTN</i>    | NM_003319:c.G69409T:p.V23137L            |
| H120 | <i>DSP</i>    | NM_004415.2:c.G4411A:p.D2070N            |
|      | <i>KCNE1</i>  | NM_001127670:c.C106T:p.R36C              |
|      | <i>MYH7</i>   | NM_000257:c.C1279A:p.L427M               |
|      | <i>SCN5A</i>  | NM_000335:c.G1982A:p.R661Q               |
|      | <i>TTN</i>    | NM_003319:c.G29752A:p.A9918T             |
| H121 | <i>MYBPC3</i> | NM_000256:c.3402_3404del:p.1134_1135del  |
|      | <i>TTN</i>    | NM_003319:c.G3271C:p.G1091R              |
| H122 | <i>TTN</i>    | NM_003319:c.C61199T:p.S20400F            |
|      | <i>TTN</i>    | NM_003319:c.T4258C:p.F1420L              |
| H123 | <i>KCNH2</i>  | NM_001204798:c.G1490T:p.G497V            |
|      | <i>MYH7</i>   | NM_000257:c.G298A:p.A100T                |
|      | <i>RBM20</i>  | NM_001134363:c.C1364T:p.S455L            |
|      | <i>TPM1</i>   | NM_001018005:c.G466A:p.E192K             |
|      | <i>TTN</i>    | NM_003319:c.C18404G:p.A6135G             |
| H124 | <i>PKP2</i>   | NM_001005242:c.A1372G:p.I458V            |
|      | <i>TTN</i>    | NM_003319:c.C62729T:p.A20910V            |
| H126 | <i>MYBPC3</i> | NM_000256:c.C859T:p.H287Y                |
|      | <i>TNNT2</i>  | NM_001001432:c.C259T:p.R92W              |
| H128 | <i>DSP</i>    | NM_001008844:c.1_2insA:p.M1fs            |
|      | <i>KCNQ1</i>  | NM_000218:c.G1520A:p.R507Q               |
|      | <i>MYH6</i>   | NM_002471:c.C70A:p.L24I                  |
|      | <i>PKP2</i>   | NM_001005242:c.G174T:p.E58D              |
|      | <i>PKP4</i>   | NM_001005476:c.G3311A:p.R1104Q           |
|      | <i>TMEM43</i> | NA(NM_024334:exon3:c.163-3C>-)           |
|      | <i>TTN</i>    | NM_003319:c.A7085G:p.Q2362R              |

|      |               |                                               |
|------|---------------|-----------------------------------------------|
|      | <i>TTN</i>    | NM_003319:c.G73852A:p.E24618K                 |
|      | <i>TTN</i>    | NM_003319:c.T54087A:p.H18029Q                 |
|      | <i>TTN</i>    | NM_133378:c.29769_29770insAGA:p.V9923delinsVE |
| H131 | <i>DSG2</i>   | NM_001943:c.A3109G:p.N1037D                   |
|      | <i>DSP</i>    | NM_001008844:c.T6394C:p.Y2731H                |
|      | <i>KCNE1</i>  | NM_001127670:c.C314T:p.S105L                  |
|      | <i>MYH6</i>   | NM_002471:c.G3164A:p.R1055Q                   |
| H132 | <i>DSP</i>    | NM_004415:c.G4105A:p.E1369K                   |
|      | <i>RBM20</i>  | NM_001134363:c.G1633A:p.V545I                 |
|      | <i>TNNI3</i>  | NM_000363:c.C592G:p.L198V                     |
| H134 | <i>DSC2</i>   | NM_024422:exon11:c.1264-5C>T                  |
|      | <i>MYBPC3</i> | NM_000256:exon30:c.3330+5G>C                  |
|      | <i>MYH6</i>   | NM_002471:exon35:c.5163+1G>T                  |
|      | <i>TTN</i>    | NM_003319:c.A58496T:p.K19499I                 |
|      | <i>TTN</i>    | NM_003319:c.C74741G:p.P24914R                 |
|      | <i>TTN</i>    | NM_003319:c.G30488A:p.R10163H                 |
|      | <i>TTN</i>    | NM_133378:c.A30866G:p.E10289G                 |
| H135 | <i>TNNT2</i>  | NM_001001432:c.T221A:p.I79N                   |
|      | <i>TTN</i>    | NM_003319:c.A61090G:p.I20364V                 |
|      | <i>TTN</i>    | NM_003319:c.T68527C:p.Y22843H                 |
|      | <i>TTN</i>    | NM_133379:c.C15122G:p.T5041R                  |
| H136 | <i>DSP</i>    | NM_001008844:c.1_2insA:p.M1fs                 |
|      | <i>TTN</i>    | NM_003319:c.16639_16644del:p.5547_5548del     |
| H139 | <i>DSP</i>    | NM_001008844:c.1_2insA:p.M1fs                 |
|      | <i>KCNQ1</i>  | NM_000218:c.C1201T:p.R401W                    |
|      | <i>PNN</i>    | NM_002687:c.A1646C:p.H549P                    |
|      | <i>TTN</i>    | NM_133437:exon44:c.9977-4G>A                  |
|      | <i>TTN</i>    | NM_003319:c.T39904C:p.S13302P                 |
| H140 | <i>TNNI3</i>  | NM_000363:c.G511A:p.A171T                     |
|      | <i>TTN</i>    | NM_003319:c.C25657T:p.R8553C                  |
|      | <i>TTN</i>    | NM_003319:c.G11659A:p.V3887M                  |
| H141 | <i>ANK2</i>   | NM_001148:c.C5231T:p.A1744V                   |
|      | <i>MYH6</i>   | NM_002471:c.C3932T:p.T1311I                   |
|      | <i>TTN</i>    | NM_003319:c.G19060T:p.A6354S                  |
|      | <i>TTN</i>    | NM_003319:c.G58601A:p.R19534H                 |
| H142 | <i>RBM20</i>  | NM_001134363:c.G3023A:p.R1008Q                |
|      | <i>TTN</i>    | NM_003319:c.47401_47403del:p.15801_15801del   |
| H143 | <i>ANK2</i>   | NM_020977:c.C5461T:p.R1821W                   |
|      | <i>TNNT2</i>  | NM_001001432:c.C814T:p.R278C                  |
|      | <i>TTN</i>    | NM_133378:c.29769_29770insAGA:p.V9923delinsVE |
| H144 | <i>DSP</i>    | NM_001008844:c.G1483A:p.V495M                 |
|      | <i>TTN</i>    | NM_003319:c.A42481G:p.S14161G                 |
|      | <i>TTN</i>    | NM_003319:c.G20528A:p.R6843H                  |
|      | <i>TTN</i>    | NM_003319:c.G55615A:p.G18539S                 |
|      | <i>TTN</i>    | NM_133378:c.G16579C:p.E5527Q                  |
|      | <i>TTN</i>    | NM_133379:c.A13936G:p.K4646E                  |
| H145 | <i>MYBPC3</i> | NM_000256:c.G2459A:p.R820Q                    |
|      | <i>TTN</i>    | NM_003319:c.G18785A:p.R6262H                  |
|      | <i>TTN</i>    | NM_133378:c.T32555C:p.V10852A                 |
| H146 | <i>ANK2</i>   | NM_001148:c.G7132A:p.E2378K                   |
|      | <i>MYBPC3</i> | NM_000256:c.G977A:p.R326Q                     |
| H147 | <i>MYBPC3</i> | NM_000256:c.C484T:p.Q162X                     |

|      |               |                                       |
|------|---------------|---------------------------------------|
|      | <i>TTN</i>    | NM_003319:c.G23990A:p.S7997N          |
| H150 | <i>JUP</i>    | NM_002230:c.A1324T:p.I442F            |
|      | <i>MYBPC3</i> | NA(NM_000256:exon17:c.1624+5G>T)      |
|      | <i>TTN</i>    | NM_003319:c.A19733G:p.H6578R          |
|      | <i>TTN</i>    | NM_003319:c.C49544A:p.T16515K         |
|      | <i>TTN</i>    | NM_003319:c.C57676T:p.R19226C         |
|      | <i>TTN</i>    | NM_003319:c.T3467C:p.V1156A           |
| H151 | <i>TTN</i>    | NM_003319:c.C41222T:p.T13741I         |
|      | <i>TTN</i>    | NM_133378:c.C18047A:p.S6016Y          |
|      | <i>TTN</i>    | NM_133379:c.C16001T:p.P5334L          |
| H152 | <i>ANK2</i>   | NM_001148:c.G8240A:p.R2747H           |
|      | <i>DSG2</i>   | NM_001943:c.A545G:p.N182S             |
|      | <i>MYH6</i>   | NM_002471:c.G2071A:p.V691I            |
| H153 | <i>TTN</i>    | NM_003319:c.G4394A:p.G1465D           |
|      | <i>TTN</i>    | NM_003319:c.G65810T:p.S21937I         |
| H154 | <i>MYBPC3</i> | NM_000256:c.1019_1026del:p.340_342del |
|      | <i>TTN</i>    | NM_133378:c.A24205G:p.T8069A          |
| H155 | <i>CSRP3</i>  | NM_001127656:c.T10C:p.W4R             |
|      | <i>DSP</i>    | NM_004415:c.A5120G:p.Q1707R           |
|      | <i>TTN</i>    | NM_003319:c.G43636A:p.A14546T         |
| H156 | <i>MYH6</i>   | NM_002471:c.G5594A:p.R1865Q           |
|      | <i>TNNT2</i>  | NM_000364:exon17:c.843-3C>A           |
| H157 | <i>PKP4</i>   | NM_001005476:c.A329G:p.Q110R          |
|      | <i>TTN</i>    | NM_133437:exon156:c.43097-5C>G        |
|      | <i>TTN</i>    | NM_003319:c.A42481G:p.S14161G         |
|      | <i>TTN</i>    | NM_003319:c.G20528A:p.R6843H          |
|      | <i>TTN</i>    | NM_133379:c.A13936G:p.K4646E          |
| H159 | <i>DSC2</i>   | NM_024422:c.2685_2686insAG:p.A895fs   |
|      | <i>DSP</i>    | NM_004415.2:p.K2450N                  |
| H160 | <i>MYBPC3</i> | NM_000256:c.G1484A:p.R495Q            |
|      | <i>MYH6</i>   | NA(NM_002471:exon23:c.2928+5G>A)      |
|      | <i>PLN</i>    | NM_002667:c.C73T:p.R25C               |
| H161 | <i>DSP</i>    | NM_004415.2:c.G4411A:p.D2070N         |
|      | <i>MYH7</i>   | NM_000257:c.C1207T:p.R403W            |
| H163 | <i>DSC2</i>   | NM_024422:c.2685_2686insAG:p.A895fs   |
|      | <i>DSP</i>    | NM_004415.2:c.G4411A:p.D2070N         |
|      | <i>MYBPC3</i> | NM_000256:c.174_184del:p.58_62del     |
|      | <i>VCL</i>    | NM_003373:c.A1555C:p.I519L            |
| H164 | <i>DSG2</i>   | NM_001943:c.T473G:p.V158G             |
|      | <i>MYH7</i>   | NM_000257:c.G4066A:p.E1356K           |
| H165 | <i>MYBPC3</i> | NM_000256:c.2604delT:p.G868fs         |
|      | <i>TTN</i>    | NM_003319:c.C61199T:p.S20400F         |
|      | <i>TTN</i>    | NM_003319:c.T4258C:p.F1420L           |
| H167 | <i>ANK2</i>   | NM_020977:c.T4646A:p.V1549D           |
|      | <i>DSC2</i>   | NM_004949:c.C266T:p.S89L              |
|      | <i>DSP</i>    | NM_001008844:c.1_2insA:p.M1fs         |
|      | <i>MYH7</i>   | NM_000257:c.G2609A:p.R870H            |
|      | <i>TTN</i>    | NM_003319:c.C76441T:p.R25481C         |
|      | <i>TTN</i>    | NM_003319:c.G20053A:p.V6685I          |
| H169 | <i>MYL3</i>   | NM_000258:c.C476T:p.T159M             |
|      | <i>RBM20</i>  | NM_001134363:c.G3373A:p.E1125K        |
|      | <i>TTN</i>    | NM_003319:c.A25349G:p.H8450R          |

|      |               |                                               |
|------|---------------|-----------------------------------------------|
|      | <i>TTN</i>    | NM_003319:c.G36598A:p.D12200N                 |
| H170 | <i>MYBPC3</i> | NM_000256:c.G1624C:p.E542Q                    |
|      | <i>TTN</i>    | NM_003319:c.C21100T:p.R7034W                  |
|      | <i>TTN</i>    | NM_003319:c.C45796T:p.R15266C                 |
| H171 | <i>TTN</i>    | NM_003319:c.G20120A:p.R6707Q                  |
|      | <i>TTN</i>    | NM_133378:c.C15044G:p.T5015S                  |
| H172 | <i>KCNH2</i>  | NM_172057:c.G2144A:p.R715Q                    |
|      | <i>RYR2</i>   | NM_001035:c.C3037T:p.R1013W                   |
| H173 | <i>ANK2</i>   | NM_020977:c.G5536A:p.E1846K                   |
|      | <i>DSP</i>    | NM_004415.2:c.G4411A:p.D2070N                 |
|      | <i>KCNQ1</i>  | NM_000218:c.C458T:p.T153M                     |
|      | <i>MYH6</i>   | NM_002471:c.C4704A:p.N1568K                   |
| H174 | <i>MYH7</i>   | NM_000257:c.G1063A:p.A355T                    |
|      | <i>TNNT2</i>  | NM_001001432:c.A794T:p.N271I                  |
|      | <i>TTN</i>    | NM_133378:c.C28892T:p.P9631L                  |
| H175 | <i>MYL2</i>   | NM_000432:c.G64A:p.E22K                       |
|      | <i>TTN</i>    | NM_003319:c.T62789C:p.I20930T                 |
|      | <i>TTN</i>    | NM_133378:c.29784_29785insAGG:p.E9928delinsEG |
| H176 | <i>RYR2</i>   | NA(NM_001035:exon72:c.10324-4A>G)             |
|      | <i>RYR2</i>   | NM_001035:c.C10681G:p.L3561V                  |
| H177 | <i>DSC2</i>   | NM_024422:c.2685_2686insAG:p.A895fs           |
|      | <i>PKP2</i>   | NM_001005242:c.G775T:p.E259X                  |
|      | <i>TTN</i>    | NM_003319:c.G23419C:p.A7807P                  |
| H178 | <i>MYH6</i>   | NA(NM_002471:exon23:c.2928+5G>A)              |
|      | <i>TTN</i>    | NM_003319:c.G62231A:p.R20744Q                 |
| H179 | <i>CASQ2</i>  | NM_001232:c.1183_1185del:p.395_395del         |
|      | <i>MYBPC3</i> | NM_000256:c.G655C:p.V219L                     |
|      | <i>RBM20</i>  | NM_001134363:c.G1766A:p.R589Q                 |
|      | <i>TTN</i>    | NM_003319:c.C49544A:p.T16515K                 |
|      | <i>TTN</i>    | NM_003319:c.G24587A:p.R8196Q                  |
|      | <i>TTN</i>    | NM_003319:c.T3467C:p.V1156A                   |
| H180 | <i>MYH7</i>   | NM_000257:c.G2221C:p.G741R                    |
|      | <i>PKP4</i>   | NM_001005476:c.A2168G:p.Y723C                 |
| H181 | <i>TPM1</i>   | NM_000366:exon4:c.375-5T>C                    |
|      | <i>TTN</i>    | NM_003319:c.A12880C:p.N4294H                  |
|      | <i>TTN</i>    | NM_003319:c.C33626T:p.P11209L                 |
|      | <i>TTN</i>    | NM_133378:c.C19500G:p.N6500K                  |
| H182 | <i>MYBPC3</i> | NM_000256:c.2373_2374insG:p.Q791fs            |
|      | <i>RYR2</i>   | NA(NM_001035:exon72:c.10324-4A>G)             |
|      | <i>TTN</i>    | NM_003319:c.C71099G:p.A23700G                 |
|      | <i>TTN</i>    | NM_003319:c.G31202C:p.G10401A                 |
|      | <i>TTN</i>    | NM_003319:c.G34727A:p.R11576Q                 |
|      | <i>TTN</i>    | NM_133379:c.G16160A:p.C5387Y                  |
| H183 | <i>RBM20</i>  | NM_001134363:c.G3373A:p.E1125K                |
|      | <i>TTN</i>    | NM_003319:c.G77056C:p.A25686P                 |
| H184 | <i>ANK2</i>   | NM_001148:c.A4373G:p.E1458G                   |
|      | <i>MYBPC3</i> | NM_000256:exon26:c.2603-2A>G                  |
|      | <i>TTN</i>    | NM_133378:c.29769_29770insAGA:p.V9923delinsVE |
|      | <i>TTN</i>    | NM_133378:c.29780_29781insAAT:p.E9927delinsEX |
| H185 | <i>CSRP3</i>  | NM_001127656:c.T10C:p.W4R                     |
|      | <i>TTN</i>    | NM_003319:c.A45629T:p.K15210I                 |
| H186 | <i>CAV3</i>   | NM_001234:c.C216G:p.C72W                      |

|      |               |                                                         |
|------|---------------|---------------------------------------------------------|
|      | <i>DSP</i>    | NM_001008844:c.1_2insA:p.M1fs                           |
|      | <i>MYBPC3</i> | NA(NM_000256:exon17:c.1624+4A>T)                        |
|      | <i>MYH6</i>   | NM_002471:c.C5140T:p.R1714W                             |
|      | <i>SCN5A</i>  | NM_001099405:c.T5956C:p.F2004L                          |
| H189 | <i>MYH7</i>   | NM_000257:c.G2348A:p.R783H                              |
|      | <i>TTN</i>    | NM_133378:c.A13316G:p.Y4439C                            |
|      | <i>TTN</i>    | NM_133379:c.C13586G:p.A4529G                            |
| H190 | <i>DSC2</i>   | NM_004949:c.C1787T:p.A596V                              |
|      | <i>MYH7</i>   | NM_000257:c.G1816A:p.V606M                              |
| H191 | <i>TTN</i>    | NM_003319:c.C41935T:p.P13979S                           |
|      | <i>TTN</i>    | NM_003319:c.C46139T:p.T15380I                           |
| H192 | <i>MYH7</i>   | NM_000257:c.T1870A:p.Y624N                              |
|      | <i>TTN</i>    | NM_003319:c.G72706A:p.E24236K                           |
|      | <i>TTN</i>    | NM_003319:c.T76493C:p.V25498A                           |
|      | <i>TTN</i>    | NM_133378:c.C13492T:p.L4498F                            |
| H195 | <i>TTN</i>    | NM_003319:c.A42481G:p.S14161G                           |
|      | <i>TTN</i>    | NM_003319:c.C2080A:p.R694S                              |
|      | <i>TTN</i>    | NM_003319:c.G20528A:p.R6843H                            |
|      | <i>TTN</i>    | NM_003319:c.T62794A:p.L20932M                           |
|      | <i>TTN</i>    | NM_133378:c.T20343G:p.I6781M                            |
|      | <i>TTN</i>    | NM_133379:c.A13936G:p.K4646E                            |
|      | <i>VCL</i>    | NM_003373:c.A1157G:p.K386R                              |
| H196 | <i>DSC2</i>   | NM_004949:c.G857T:p.G299+G31V                           |
|      | <i>TTN</i>    | NM_003319:c.G34874A:p.R11625Q                           |
| H197 | <i>MYBPC3</i> | NM_000256:exon13:c.1090+1G>T                            |
|      | <i>TTN</i>    | NM_003319:c.A45736G:p.T15246A                           |
| H199 | <i>ANK2</i>   | NM_001148:c.G5032A:p.E1678K                             |
|      | <i>DSG2</i>   | NM_001943:c.C2750T:p.A917V                              |
|      | <i>TTN</i>    | NM_003319:c.A7085G:p.Q2362R                             |
| H200 | <i>ANK2</i>   | NM_001148:c.A7183C:p.T2395P                             |
|      | <i>SCN5A</i>  | NM_000335:c.G1655C:p.G552A                              |
|      | <i>TPM1</i>   | NM_001018005:c.A653G:p.D254G                            |
| H202 | <i>DSP</i>    | NM_001008844:c.1_2insA:p.M1fs                           |
|      | <i>MYH6</i>   | NM_002471:c.A1763C:p.D588A                              |
| H203 | <i>TTN</i>    | NM_003319:c.74120_74121insAGCCTTCAG:p.K24707 delinsKPSE |
|      | <i>TTN</i>    | NM_003319:c.74131_74132insCCTTCAGAT:p.P24711 delinsPSDP |
|      | <i>TTN</i>    | NM_003319:c.C26953T:p.R8985C                            |
| H205 | <i>DSP</i>    | NM_001008844:c.1_2insA:p.M1fs                           |
|      | <i>MYH6</i>   | NA(NM_002471:exon23:c.2928+5G>A)                        |
|      | <i>PLN</i>    | NM_002667:c.T53C:p.I18T                                 |
|      | <i>TTN</i>    | NM_003319:c.A45629T:p.K15210I                           |
|      | <i>TTN</i>    | NM_003319:c.A47900G:p.Y15967C                           |
| H206 | <i>MYBPC3</i> | NM_000256:c.2605_2606insC:p.P869fs                      |
|      | <i>RBM20</i>  | NM_001134363:c.C1364T:p.S455L                           |
|      | <i>TTN</i>    | NM_003319:c.C35416G:p.L11806V                           |
| H207 | <i>RBM20</i>  | NM_001134363:c.C1364T:p.S455L                           |
|      | <i>TTN</i>    | NM_003319:c.C35416G:p.L11806V                           |
| H208 | <i>SCN5A</i>  | NM_001099405:c.G5401A:p.D1819N                          |
|      | <i>TTN</i>    | NM_133437:exon179:c.70574-3T>C                          |
|      | <i>TTN</i>    | NM_003319:c.A44954G:p.E14985G                           |
|      | <i>TTN</i>    | NM_133378:c.G30865C:p.E10289Q                           |

|      |              |                               |
|------|--------------|-------------------------------|
| H209 | <i>ANK2</i>  | NM_001148:c.A7117G;p.T2373A   |
|      | <i>MYH6</i>  | NM_002471:c.C2425T;p.R809C    |
|      | <i>RYR2</i>  | NM_001035:c.C3151T;p.R1051C   |
|      | <i>RYR2</i>  | NM_001035:c.G6450A;p.M2150I   |
|      | <i>TNNI3</i> | NM_000363:c.G485A;p.R162Q     |
|      | <i>TTN</i>   | NM_003319:c.A16081G;p.K5361E  |
|      | <i>TTN</i>   | NM_003319:c.G23222A;p.G7741E  |
|      | <i>TTN</i>   | NM_133378:c.G31999A;p.E10667K |
